1 **Title: A neural hub that coordinates learned and innate courtship behaviors**

2

3 **Authors:** Mor Ben-Tov, Fabiola Duarte, and Richard Mooney\*

4

5 **Affiliation:** Department of Neurobiology, Duke University, Durham NC 27710

6

7 \*Correspondence to: Richard Mooney, [mooney@neuro.duke.edu](mailto:mooney@neuro.duke.edu)

8

## 9 **Abstract**

10 Holistic behaviors often require the coordination of innate and learned movements. The neural circuits  
11 that enable such coordination remain unknown. Here we identify a midbrain cell group (A11) that  
12 enables male zebra finches to coordinate their learned songs with various innate behaviors, including  
13 female-directed calling, orientation and pursuit. Anatomical mapping reveals that A11 is at the center of  
14 a complex network including the song premotor nucleus HVC as well as brainstem regions crucial to  
15 innate calling and locomotion. Notably, lesioning A11 terminals in HVC blocked female-directed singing,  
16 but did not interfere with female-directed calling, orientation or pursuit. In contrast, lesioning A11 cell  
17 bodies abolished all female-directed courtship behaviors. However, males with either type of lesion still  
18 produced songs when in social isolation. Lastly, monitoring A11 terminals in HVC showed that during  
19 courtship A11 inputs to the song premotor cortex signal the transition from innate to learned  
20 vocalizations. These results show how a brain region important to reproduction in both birds and  
21 mammals coordinates learned vocalizations with innate, ancestral courtship behaviors.

22

## 23 **Introduction**

24 Complex appetitive behaviors, including foraging, hunting, tool use and courtship, often require the  
25 coordination of innate and learned movements (Demir et al., 2020; Keleman et al., 2012; Riotte-Lambert  
26 & Weimerskirch, 2013; Zampiga et al., 2006). For example, capuchin monkeys build on innate motor  
27 programs for grasping rocks and other objects to develop highly skilled and coordinated nut cracking  
28 skills (Ottoni & Izar, 2008), and male *Drosophila* (flies) learn to identify receptive mates by integrating  
29 innate and learned responses to female pheromones (Demir et al., 2020; Keleman et al., 2012). While  
30 studies in flies that have shown how learned and innate sensory cues are integrated in the brain to  
31 support successful courtship (Dickson, 2008; Keleman et al., 2012), little is known about how learned  
32 and innate motor programs are coordinated to enable complex courtship behaviors. The courtship

33 display of the male zebra finch includes a learned song comprising a sequence of stereotyped syllables,  
34 or motif, that is seamlessly coordinated with a variety of innate behaviors, including female-directed  
35 calling, orientation, and pursuit (Klaus Immelmann, 1971; Ullrich et al., 2016; Williams, 2001) (Movie S1),  
36 providing the potential to understand the neural basis for such complex coordination. Despite this  
37 potential, little is known about the neural circuits that enable the coordinate of the learned and innate  
38 motor programs underlying the male zebra finch's elaborate courtship behaviors.

39 Presumably, the neural circuits that enable such coordination must access motor regions for song as  
40 well as those that control innate vocalizations and female-directed head and body movements. Studies  
41 of zebra finches, as well as other songbirds, have thoroughly characterized how specialized forebrain  
42 nuclei, especially the song premotor nucleus HVC, control and pattern the motif (Appeltants et al., 2000;  
43 Aronov et al., 2008; Egger et al., 2020; Hahnloser et al., 2002; K. Hamaguchi & Mooney, 2012; Kosuke  
44 Hamaguchi et al., 2016; Long et al., 2010; Long & Fee, 2008; McCasland & Konishi, 1981; Nottebohm et  
45 al., 1976; Vu et al., 1998). In addition, vocal gating and locomotor circuits have been identified in the  
46 avian midbrain periaqueductal gray (PAG) (Fukushima & Aoki, 2000; Nieder & Mooney, 2020; Seller,  
47 1981; Simpson & Vicario, 1990)) and pontine reticular formation (Steeves et al., 1987; D. M. S. Webster  
48 & Steeves, 1991; Deirdre M. S. Webster & Steeves, 1988), respectively. However, how activity is  
49 coordinated across such highly distributed motor regions to enable the male's holistic courtship display  
50 remains a mystery. One idea is that a neural circuit that receives information about sexual motivation  
51 and communicates with HVC as well as the PAG and pontine reticular formation achieves this  
52 coordination.

53  
54 The midbrain A11 cell group is part of a larger constellation of dopaminergic neurons found in all  
55 vertebrates (Anton Reiner et al., 1994; Smeets & González, 2000) that are implicated in motor control,  
56 motivation, reward and reproduction (Coddington & Dudman, 2018; da Silva et al., 2018; Goodson et al.,

57 2009; Mohebi et al., 2019). The midbrain A11 in certain songbirds has been shown to receive input from  
58 the medial preoptic nucleus (POM) (Balthazart & Absil, 1997; Ritters & Alger, 2004), a region important  
59 to appetitive and consummatory aspects of reproduction (Ball & Balthazart, 2004; Gahr, 2001; Trainor et  
60 al., 2003), and extends axons into HVC, raising the possibility that it functions to coordinate learned and  
61 innate aspects of the male's courtship display. In fact, A11 neurons in male finches are activated in a  
62 variety of salient interactions with other zebra finches, including when an adult male engages in female-  
63 directed singing (Bharati & Goodson, 2006; Goodson et al., 2009), a sexually-motivated vocal display  
64 that is an essential appetitive component of successful courtship behavior in this songbird species. Here  
65 we combine pathway tracing combined with molecular phenotyping, cell- and axon-terminal specific  
66 manipulations, vocal analysis and machine learning tools, and in vivo calcium imaging, to reveal that A11  
67 functions as a neural hub to smoothly and rapidly coordinate the learned and innate movements  
68 necessary to the complex courtship displays of male zebra finches.

69

## 70 **Results**

### 71 **A11 axons target regions that encode learned and innate motor programs important to courtship**

72 Although A11's connections with HVC and POM have been previously described in songbirds, its broader  
73 pattern of afferent and efferent connectivity to other brain regions that may be important to courtship  
74 behaviors awaits description. To begin to provide such a description, we injected either conventional or  
75 genetically encoded anterograde tracers into the A11 of adult male zebra finches (Figure 1A, B Figure 1 –  
76 supplementary figure 1). These injections resulted in dense terminal labeling in the intercollicular  
77 nucleus of the dorsal midbrain (DM/ICo), which controls innate vocalizations in birds (Fukushima & Aoki,  
78 2000; Seller, 1981; Simpson & Vicario, 1990) (Figure 1C); the gigantocellular part of the reticular nucleus  
79 of the caudal pons (RPgc), a major locomotor region (Steeves et al., 1987; D. M. S. Webster & Steeves,  
80 1991; Deirdre M. S. Webster & Steeves, 1988) (Figure 1D); and also confirmed A11's known projection to

81 HVC (Appeltants et al., 2000; Ball & Balthazart, 2004) (Figure 1E). The locations of these three axonal  
82 terminations of A11 correspond to three elements of the male zebra finch's holistic courtship display,  
83 namely female-directed innate vocalizations (DM/ICo), female pursuit and orientation (RPgc), and  
84 female-directed song (HVC). We also injected retrograde tracers into A11 of adult males to identify  
85 brain regions that provide it with synaptic inputs (Figure 1A). These injections identified three major  
86 sources of input to A11: the DM/ICo, the lateral deep cerebellar nucleus (lateral DCN, also known as the  
87 dentate nucleus), and the medial preoptic nucleus (POM) (Figure 1F-H). As such, A11 is situated to  
88 receive information about call generation (from the DM/ICo), sensorimotor integration and motor  
89 timing (through the DCN (Izawa et al., 2012; Proville et al., 2014)), and sexual motivation (via the POM  
90 (Ball & Balthazart, 2004; Balthazart & Absil, 1997; Gahr, 2001; Ritters & Alger, 2004; Trainor et al.,  
91 2003)).

92

### 93 **A11 neurons synthesize both dopamine and glutamate**

94 In addition to expressing TH, many DA neurons in mammals also express mRNAs for excitatory and  
95 inhibitory neurotransmitters, such as glutamate (Cai & Ford, 2018; Stuber et al., 2010) and gamma-  
96 aminobutyric acid (GABA) (Tritsch et al., 2012, 2014). To begin to better understand whether A11 cells  
97 in the zebra finch also might possess such dual transmitter identities, we combined retrograde tracing  
98 from HVC along with in situ hybridization chain reaction (Choi et al., 2018) for tyrosine hydroxylase (TH,  
99 a marker for dopaminergic neurons (Daubner et al., 2011)), the vesicular glutamate transporter 2  
100 (VGLUT2, a marker of glutamatergic neurons (El Mestikawy et al., 2011)) and/or the vesicular inhibitory  
101 amino acid transporter (VGAT, a marker of GABA neurons (McIntire et al., 1997)). We found that the  
102 majority of TH+ A11 neurons, including those that project to HVC, were also VGLUT2+, while none were  
103 VGAT+ (Figure 2A-F). Thus, in addition to neuromodulatory effects mediated by DA, A11 neurons  
104 presumably also exert fast excitatory effects on their postsynaptic targets in HVC.

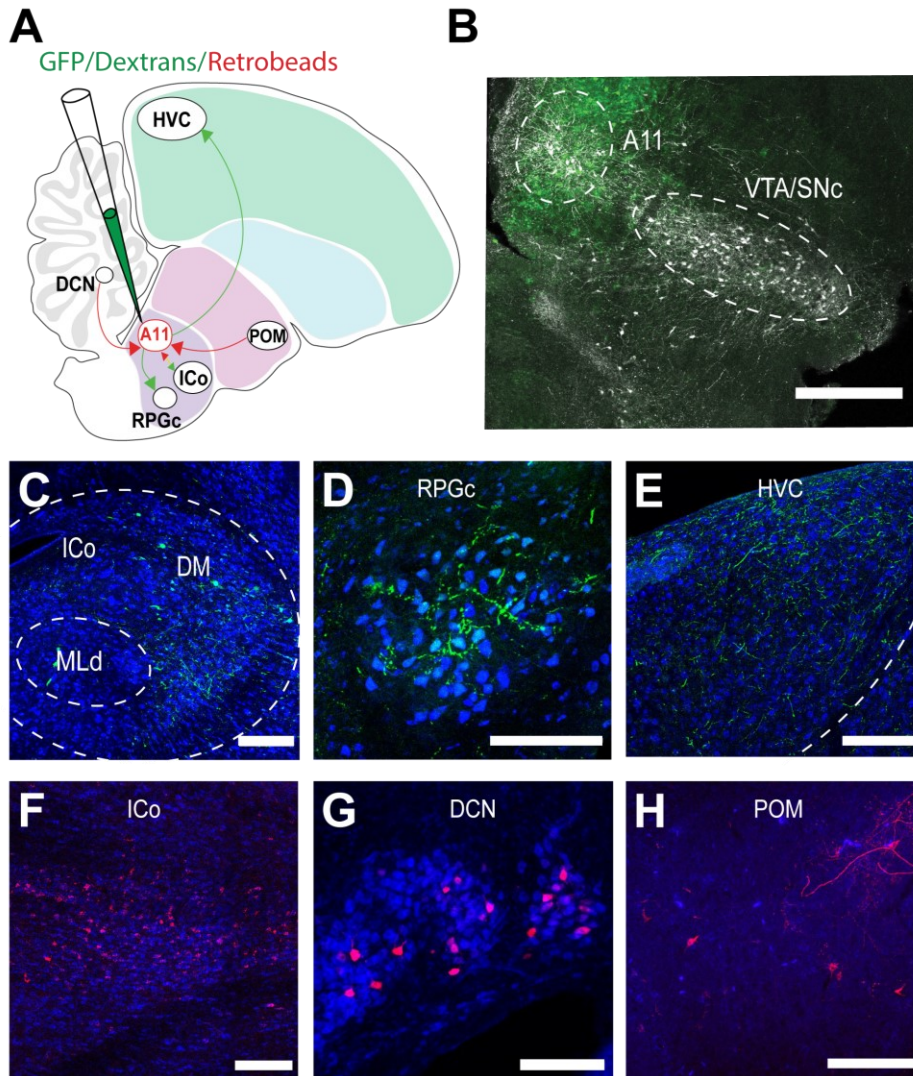

**Figure 1: A11 axons target regions that encode learned and innate motor programs important to courtship.**

(A) Schematic of male finch brain in sagittal view showing injection of anterograde (GFP/dextrans) or retrograde (retrobeads/dextrans) tracers and A11's efferents (green) and afferents (red). Consensus map is drawn from n=5 hemispheres from N=5 birds. (B) Representative injection site of a viral anterograde tracing strategy with GFP (green) and fluorescent antibody labeling of TH+ cells (pseudo-coloured grey). (C-E) Axonal projections from A11 to HVC, ICo and RPGc. (G-H) Cell bodies retrogradely labelled from A11 in DM, ICo, DCN and POM. DCN, deep cerebellar nucleus; DM, dorsomedial part of the intercollicular nucleus (ICo); MLd, dorsal part of the mesencephalic nucleus; POM, medial preoptic nucleus; RPGc, gigantocellular part of the reticular nucleus of the caudal pons; SNc, substantia nigra pars compacta; VTA, ventral tegmental area. Scale bars in (C-H) are 200 μm. See also Figure 1 – figure supplement 1.

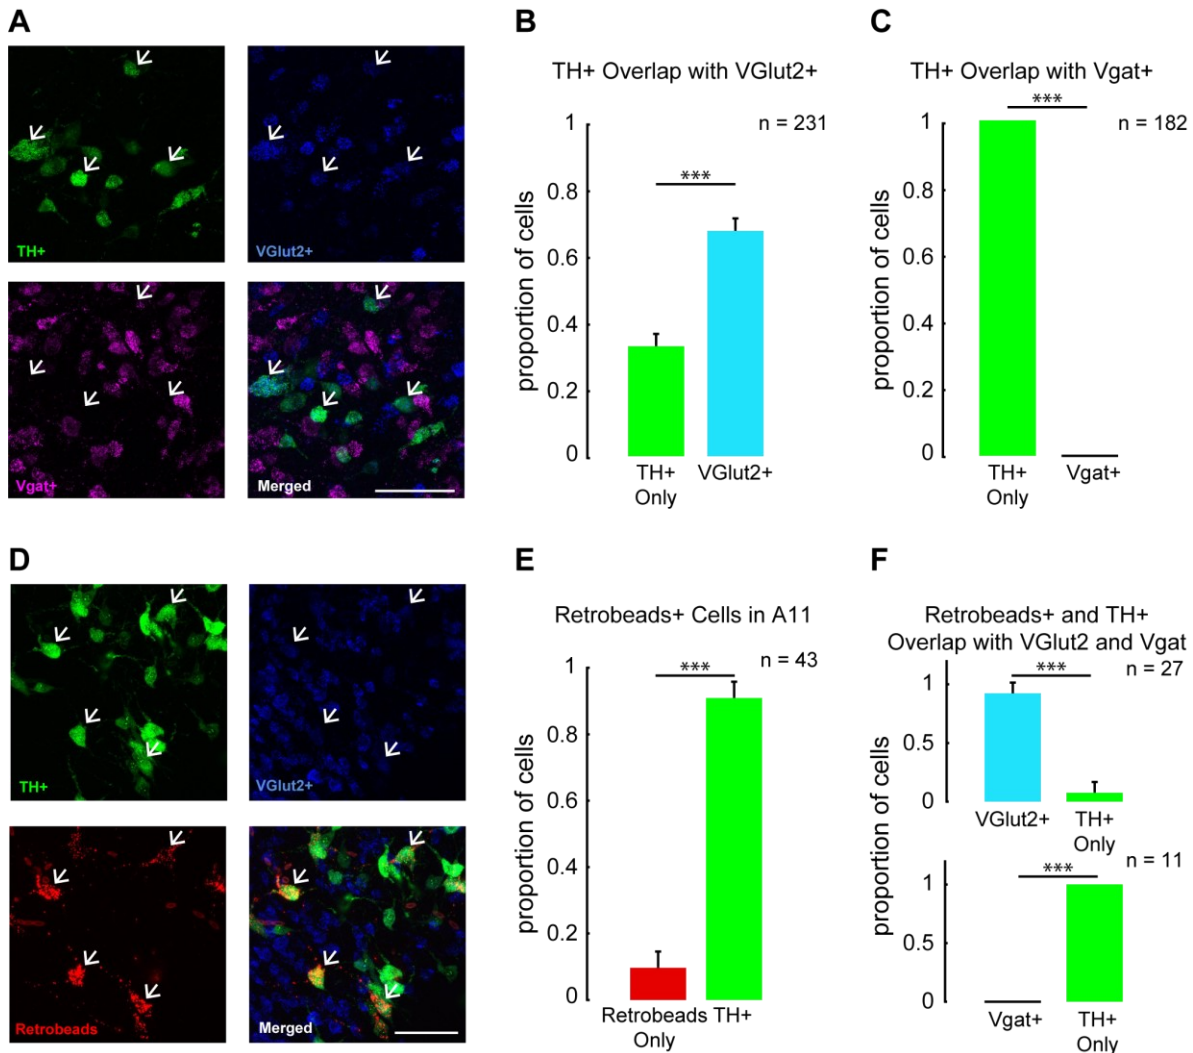

**Figure 2: A11 neurons synthesize both dopamine and glutamate.** (A) High-magnification images of A11 show the overlap of TH<sup>+</sup> cells (green), VGlut2<sup>+</sup> cells (blue) and VGAT<sup>+</sup> cells (magenta). Scale bar, 100  $\mu$ m. (B) Proportion of TH<sup>+</sup> neurons in A11 that are also VGlut2<sup>+</sup>.  $\chi^2$  test,  $\chi^2_1=23.07$ ,  $p<0.0001$ ,  $n = 9$  hemispheres from 5 birds. (C) Proportion of TH<sup>+</sup> neurons in A11 that are also VGAT<sup>+</sup>.  $\chi^2$  test,  $\chi^2_1=182$ ,  $p<0.0001$ ,  $n = 5$  hemispheres from 3 birds. (D) High-magnification images of A11 show the overlap of HVC-projecting neurons in HVC that are also TH<sup>+</sup> cells (green) and VGlut2<sup>+</sup> cells (blue). Scale bar, 100  $\mu$ m. (E) Proportion of HVC-projecting cells in A11 that are also TH<sup>+</sup>.  $\chi^2$  test,  $\chi^2_1=25.33$ ,  $p<0.0001$ ,  $n = 6$  hemispheres from 3 birds. (F) Proportion of TH<sup>+</sup> HVC-projecting cells in A11 that are also VGlut2<sup>+</sup> or VGAT<sup>+</sup>.  $\chi^2$  test,  $\chi^2_1=13.33$ ,  $p=0.0002$ ,  $n = 4$  hemispheres from 2 birds and  $\chi^2_1=11$ ,  $p<0.0001$ ,  $n = 2$  hemispheres from 1 bird, respectively. Data are mean  $\pm$  s.e.m.

107 **A11 cell bodies and their terminals in HVC are crucial for female-directed song, a learned behavior**

108 The divergent anatomical projections of A11 neurons raise the possibility that A11 plays an important  
109 role in male courtship behaviors. Therefore, we studied how the male behaved when placed in a  
110 chamber where visual access to the female could be carefully controlled via an electronic glass partition  
111 and monitored his vocal and non-vocal behaviors using audio and video recordings (Figure 3A). Notably,  
112 granting the male visual access to the female elicited a range of female-directed behaviors, including  
113 female directed singing (Figure 3B, (top panel)). Male zebra finches also sing in social isolation, a  
114 behavior known as undirected song, which is not sexually-motivated (Sossinka & Böhner, 1980). Males  
115 in our experimental chamber readily produced undirected song when visual access to the female was  
116 blocked (Figure 3B, (bottom panel)). We first compared each male's singing behavior before and after  
117 we selectively lesioned either A11 terminals in HVC or A11 cell bodies in the midbrain with 6-  
118 hydroxydopamine (6-OHDA, (Hoffmann et al., 2016), Figure 3C,D,F,G and Figure 3 – supplementary  
119 figure 1A-E). Either treatment abolished female-directed singing in adult male zebra finches (Figure  
120 3E,H). In several birds that were tracked for longer periods, this effect persisted for at least two months  
121 post-treatment. Surprisingly, male zebra finches with A11 terminal or cell body lesions recovered their  
122 ability to sing undirected songs, albeit at reduced rates, even though they failed to sing when presented  
123 with a female (Figure 3I-K). This recovery of undirected song was achieved within 5-10 days post-lesion.  
124 We also noted that syllable structure changed in males following A11 terminal lesions but remained  
125 intact following A11 cell body lesions (Figure 3 – supplementary figure 2A-I), which may reflect increased  
126 cell death in HVC that followed 6-OHDA treatment in this nucleus (Figure 3 – supplementary figure 2J).  
127 In summary, A11 plays a particularly important role in female-directed singing, the learned component  
128 of the male's courtship display.

129



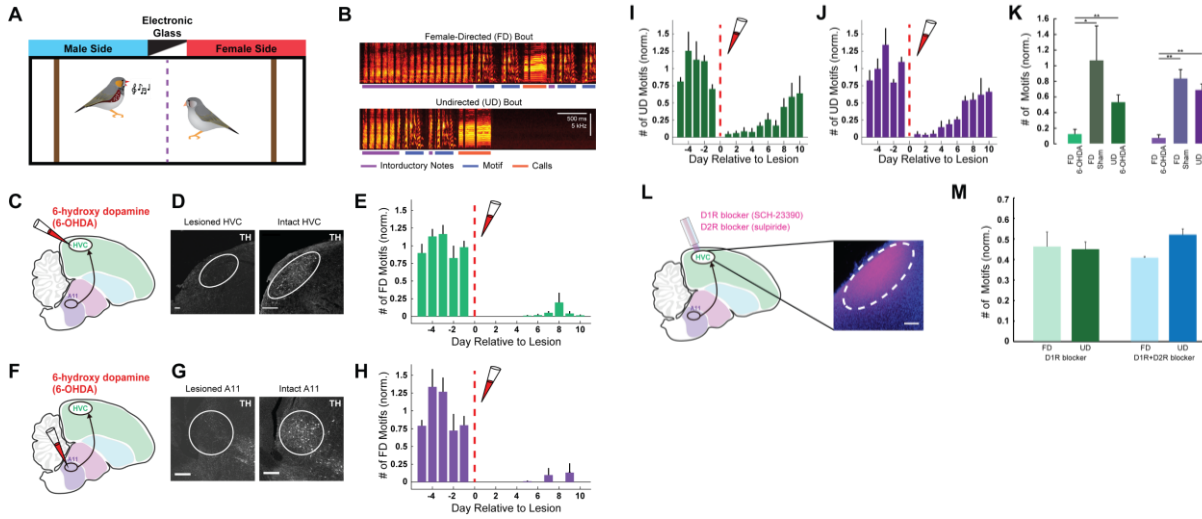

**Figure 3: A11 cell bodies and terminals in HVC are crucial for learned female-directed vocalizations. (A)**

Schematic of the behavioral paradigm. **(B)** Example sonograms of female-directed (FD) song bout and

undirected (UD) song bout. **(C)** Schematic of 6-OHDA injection to HVC, with the male finch brain shown in

sagittal view. **(D)** Dopaminergic terminals in HVC labeled with TH antibody (pseudo-colored white) in a brain

with 6-OHDA lesion in HVC (left) and an intact brain (right). **(E)** Mean normalized number of FD motifs before

and after 6-OHDA injection in HVC (N=5 birds). **(F-H)** Same as (C-E) for N=4 birds treated with 6-OHDA in A11.

**(I-J)** Same as (E and H) for undirected song bouts. **(K)** Mean post-treatment singing rates normalized to pre-

treatment singing rates. Asterisks above horizontal bars indicate significant p values. UD singing rates were

significantly higher than FD singing rates (paired t-test;  $p=0.0031$  and  $p=0.0018$  for HVC and A11 groups,

respectively). FD singing rates were significantly higher for the control group than for the treated group (t-test;

$N=5$  control birds and  $N=5$  6-OHDA treated birds,  $p=0.034$  and  $N=6$  control birds and  $N=4$  6-OHDA treated

birds,  $p=0.0009$  for HVC and A11 groups, respectively). Data are mean  $\pm$  s.e.m. **(L)** Left: Schematic of the

experiment, showing a microdialysis probe implanted in HVC and used to deliver D1 receptor (D1R) antagonist

or D1R and D2 receptor (D2R) antagonist. Right: Confocal image showing that Fast Green (pseudo-colored

magenta) diffused through the probe in HVC. Scale bar, 200  $\mu\text{m}$ . **(M)** Number of female-directed and

undirected motifs in D1R blockers days and D1R+D2R blockers days, normalized to saline days. In both

contexts, DA receptor blockade decreases singing rates by approximately half. See also Figure 3 – figure

supplements 1-2.

130

131 As just described, the A11 neurons that project to HVC synthesize and presumably release both DA and

132 glutamate. To test whether DA release in HVC is the major driver of female-directed singing, we used

133 microdialysis methods to reversibly block either D1-type or D1- and D2-type DA receptor signaling in the

134 male's HVC (Figure 3L). This treatment reduced both female-directed and undirected singing by about  
135 50%, similar to levels of undirected singing observed in males treated with 6-OHDA in either HVC or A11  
136 (Figure 3M). However, unlike these 6-OHDA males, which largely lost the ability to generate female-  
137 directed songs, males treated with D1 receptor blockers in HVC readily produced female-directed songs,  
138 albeit at a reduced rate (Figure 3M). This set of observations indicate that DA release from A11 axons in  
139 HVC facilitates singing regardless of social context, while also raising the possibility that glutamate  
140 released from A11 axons in HVC is necessary for female-directed singing.

141

#### 142 **A11 cell bodies, but not A11 terminals in HVC, are important for innate courtship behaviors**

143 We also examined these 6-OHDA-treated animals to determine whether A11 terminals in HVC or A11  
144 cell bodies are important to innate aspects of the male's courtship display (Figure 4). Males that were  
145 treated with 6-OHDA in HVC still produced a complete complement of innate courtship behaviors when  
146 granted visual access to a female. These innate behaviors included introductory notes, which are innate  
147 vocalizations that male zebra finches produce immediately prior to the learned song motif (Eales, 1985;  
148 Price, 1979; Sossinka & Böhner, 1980). In fact, males treated with 6-OHDA in HVC produced prolonged  
149 strings of introductory notes but failed to produce a motif (Figure 4A (middle panel), B). These  
150 introductory notes were similar in their spectral structure to those produced prior to the 6-OHDA  
151 treatment (Figure 4 – supplementary figure 1A-D). Furthermore, performing movement analysis using a  
152 supervised learning algorithm (DeepLabCut) (Mathis et al., 2018) revealed that males pursued and  
153 oriented towards females in a similar manner before and after 6-OHDA treatment in HVC (Figure 4C left,  
154 D, F, G, Movie S2). In contrast, males treated with 6-OHDA in A11 lost all female-directed  
155 behaviors. Specifically, when presented with a female, males with A11 cell body lesions failed to  
156 produce introductory notes (Figure 4A (bottom panel), B), did not pursue or orient towards the female,  
157 and overall spent more time moving away from the female than they did prior to the lesion (Figure 4C-D,

158 F, G, Movie S3). Notably, neither of these 6-OHDA treatments affected the male's mobility, as the  
159 overall time males spent moving around the cage while the female was present was unchanged relative  
160 to pre-treatment levels (Figure 4E). Therefore, in adult male zebra finches, A11 plays an essential role in  
161 recruiting the learned song and various innate behaviors that characterize a holistic courtship display.

162

### 163 **Monitoring the activity of A11 terminals in HVC during directed and undirected song**

164 Here we observed that males in which A11 terminals in HVC were lesioned could not produce female-  
165 directed songs but still generated introductory notes (Figure 4A). Furthermore, although HVC is not  
166 necessary for the production of innate vocalizations (Aronov et al., 2008; Nottebohm et al., 1976), which  
167 are instead gated and patterned by brainstem nuclei (Fukushima & Aoki, 2000; Seller, 1981; Simpson &  
168 Vicario, 1990; J. M. Wild et al., 1997; J. Martin Wild, 1993), prior studies have shown that HVC neurons  
169 exhibit elevated activity that is time-locked to production of introductory notes and other innate calls  
170 (Benichov et al., 2016; Benichov & Vallentin, 2020; Daliparthi et al., 2019; McCasland & Konishi, 1981; Yu  
171 & Margoliash, 1996). In light of these prior studies, our current observations raise the possibility that,  
172 during courtship, A11 transmits information about innate vocalizations to HVC that helps to coordinate  
173 the transition from introductory notes to the learned motif. To test this idea, we injected AAV axon-  
174 targeted GCaMP (Broussard et al., 2018) into the A11 of male zebra finches, waited several (3-8) weeks  
175 for expression of GCaMP in A11 axons in HVC (Figure 5 – supplementary figure 1) and then used fiber  
176 photometry to measure calcium signals in these A11 axons as the male interacted with a female partner  
177 (Figure 5A; Figure 5 – supplementary figure 2). These experiments revealed that, during female-directed  
178 singing, calcium signals in A11 axons in HVC were elevated prior to motif onset, during the period when  
179 the male is producing introductory notes (Figure 5B). Alignment of the calcium signal to the male's vocal  
180 display showed that A11 axon activity started to increase above baseline well (> 1 sec) before the first  
181 introductory note and peaked at motif onset (Figure 5E-G, Figure 5 – supplementary figure 3A-B).

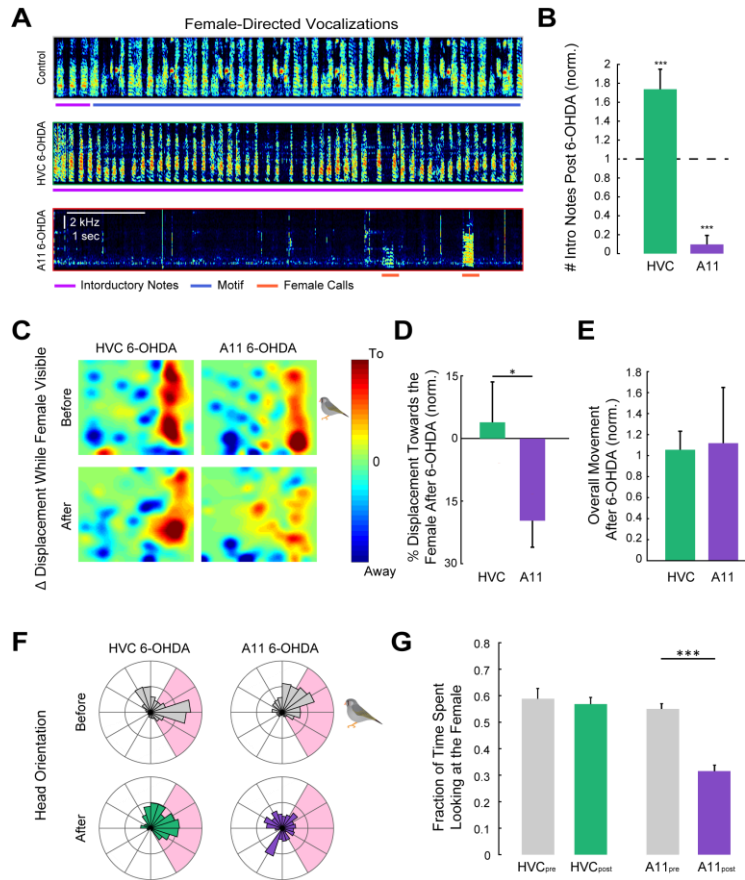

**Figure 4: Activity of A11 cell bodies, but not their terminals in HVC, is important for innate courtship behavior.**

(A) Example sonograms of female-directed vocalizations for a control male, HVC 6-OHDA male and A11 6-OHDA male. Magenta, blue and red lines denote innate introsductory, learned song motifs and female calls, respectively. (B) Mean normalized number of post-treatment FD introsductory notes. The number of introsductory notes produced significantly increased for the HVC 6-OHDA group and significantly decreased following A11 6-OHDA group (N=4 A11 treated birds and N=5 HVC treated birds, two-way repeated measures ANOVA  $p < 0.0001$ , followed by Bonferroni's multiple comparisons test,  $p = 0.0018$  and  $p = 0.0012$  for HVC and A11 groups, respectively). (C) Change in male's displacement after female presentation, before and after 6-OHDA treatment. Warm and cool colors represent displacement towards and away from the female, respectively. (D) Mean displacement towards or away from the female post-treatment, normalized to pre-treatment values. HVC 6-OHDA males moved towards the female significantly more than A11 6-OHDA males (t-test,  $p = 0.049$ ). (E) Mean overall movement post-treatment, normalized to pre-treatment values. There was not a significant difference between the two groups (t-test;  $p = 0.91$ ). (F) Example of head orientation distributions after female presentation, before and after 6-OHDA treatment. Pink shading represents the angle range in which the female was visible to the male. (G) Fraction of the time males spent looking at the female pre- and post-treatment for the two experimental groups. A11 6-OHDA males significantly reduced the time they spent looking at the female (two-way repeated measures ANOVA  $p = 0.0006$ . Post-hoc comparisons with Bonferroni's correction, for the A11 group,  $p = 0.0001$ ). Data are mean  $\pm$  s.e.m. See also Figure 4 – figure supplement 1.

183 A similar imaging strategy in which we injected AAV axon-targeted GCaMP directly into HVC (Figure 5C,  
184 D) was used to detect elevations in vocalization-related calcium signals in local HVC axons. These  
185 experiments revealed that vocalization-related increases in calcium signals in local HVC axons were  
186 delayed relative to A11 axon activity, with local axonal activity increasing above baseline ~0.5 seconds  
187 before the first introductory note and peaking in mid-motif (Figure 5E-G, Figure 5 – supplementary  
188 figure 3A-B). In contrast, during undirected song, peaks in A11 and HVC axon activity were almost  
189 simultaneous, a temporal difference from directed song that was accounted for by a rightward shift in  
190 A11 axon activity relative to motif onset (Figure 5H-J). Therefore, while A11 axons in HVC are active  
191 during both directed and undirected singing, as expected given that HVC and A11 are both nodes within  
192 a recurrent network (K. Hamaguchi & Mooney, 2012), A11 leads HVC activity during directed song  
193 whereas these two regions are simultaneously active during undirected song (Figure 5K). In addition to  
194 these timing differences, higher levels of activity in A11 also characterize female-directed singing, as  
195 expression of the immediate early gene *c-fos* was higher during female-directed relative to undirected  
196 song (Figure 5 – supplementary figure 4A-C), in agreement with an earlier study (Bharati & Goodson,  
197 2006). Lastly, the calcium-related activity of A11 axons in HVC also increased when the male produced  
198 introductory notes that did not lead to a motif and during innate calls that were female-directed, but  
199 not when the male called in social isolation (Figure 5L, M). Taken together with our lesion studies, these  
200 imaging results support a sequential process in which A11 signals HVC about the generation of female-  
201 directed innate vocalizations, such as calls and introductory notes, helping to coordinate the transition  
202 to the learned song motif.  
203

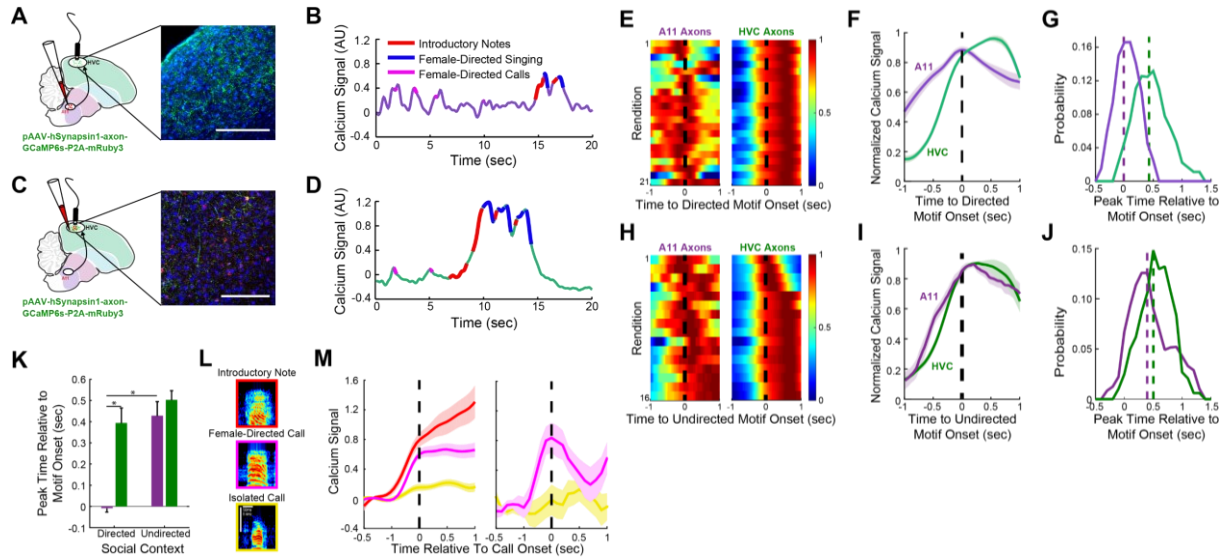

**Figure 5: Vocalization-related activity of A11 axons in HVC depends on social context.** (A) Left: schematic of male finch brain in sagittal view showing fiber photometry imaging of A11 axons in HVC (A11 axons) using axon-targeted GCaMP6s. Right: GFP+ A11 axons in HVC labeled in green. (B) Calcium signal of A11 axons in HVC of a male finch as he calls and sings to a female. Overlaid on the calcium signal are red, blue and magenta lines that denote the production of the male’s introductory notes, song motif and female-directed calls, respectively. (C, D) Same as (A, B) for axon-targeted GCaMP6s injection in HVC (HVC axons). mRuby+ cell bodies labeled in red and GFP+ axons labeled in green. (E) Example calcium traces during female-directed singing, aligned to motif onset (black dashed line), for one A11 axons bird and one HVC axons bird. (F) Mean normalized calcium activity during female-directed song motifs for the birds presented in (E). Black dashed line denotes the motif onset. (G) Peak activity time relative to motif onset. Purple and green dashed lines represent the mean peak activity of A11 axons and HVC axons, respectively (N=4 A11 axons birds and N=4 HVC axons birds). (H-J) Same as (E-G), for undirected song motifs. Data in (H-I) are from the same birds as in (E-F). Data in (J) are from N=3 A11 terminals birds and N=3 HVC axons birds. (K) Mean peak activity latencies for A11 axons (purple bars) and HVC axons (green bars) in female-directed and undirected singing relative to motif onsets. Peak activity of A11 axons during female-directed singing is significantly earlier than HVC axons peak activity during female-directed singing and from A11 axons activity during undirected singing (mixed-effects analysis,  $p < 0.05$ ,  $p < 0.0005$  and  $p < 0.01$  for the two comparisons, respectively). (L) Example sonograms of the three types of the male’s innate vocalizations: introductory notes (red), female-directed calls (magenta) and isolated calls (yellow) (M) Baseline subtracted calcium signals of A11 axons during innate vocalizations in two males. Data are mean  $\pm$  s.e.m of 12-90 isolated calls. Activity during female-directed vocalizations was significantly higher than during isolated vocalizations (t-test with Holm–Bonferroni correction for multiple comparisons,  $p < 0.001$ ). See also Figure 5 – figure supplements 1-4.

205 **Discussion**

206 To our knowledge, this study provides the first evidence of a neural hub that coordinates learned and  
207 innate motor programs to generate a holistic suite of courtship behaviors. As a variety of skilled  
208 appetitive behaviors in birds and mammals, including foraging, hunting, and tool use, also depend on  
209 the coordination of learned and innate movements (Demir et al., 2020; Keleman et al., 2012; Ottoni &  
210 Izar, 2008; Riotte-Lambert & Weimerskirch, 2013; Zampiga et al., 2006), the present findings may point  
211 to a general strategy by which midbrain cell groups participate to organize these highly skilled behaviors.  
212 Effectively, our results provide a motor counterpart to studies in flies that have shown how learned and  
213 innate sensory cues are integrated in the brain to support successful courtship (Demir et al., 2020;  
214 Dickson, 2008).

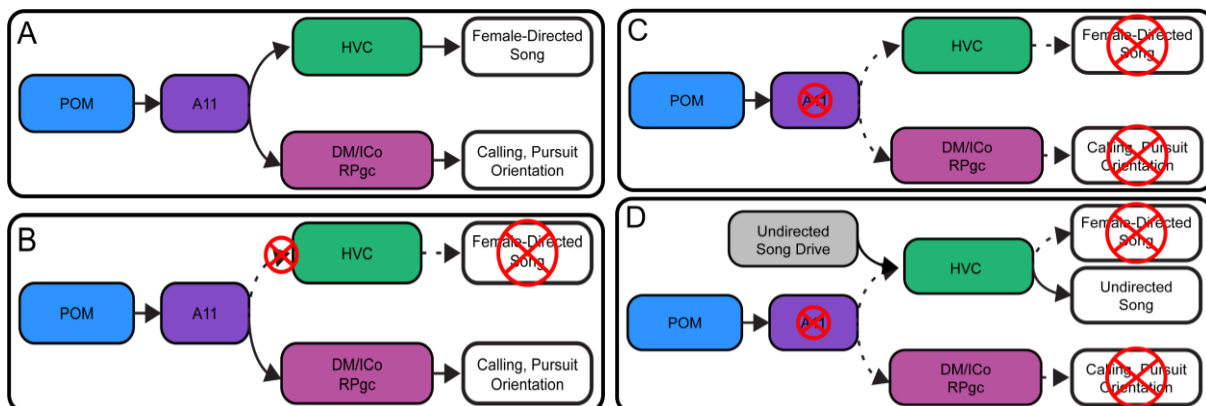

**Figure 6: A schematic describing the circuit for the coordination of learned and innate courtship behavior in male zebra finch. (A)** A11 receives projections from arousal and reproductive centers (POM) and in return sends projections to the song premotor nucleus HVC and center controlling innate calling and locomotion, DM/ICo and RPgc, respectively. These projections enable the male to sing, call, orient and pursue the female. **(B)** When we abolish A11 projections to HVC, the male is unable to produce female-directed learned songs, while the innate courtship behaviors are intact. **(C)** When we abolish A11 cell bodies, the male is unable to produce both learned and innate elements of courtship behavior. **(D)** However, males can still produce isolated, undirected songs, which implies the existence of undirected song drive to HVC.

215 A striking feature of the sexually-motivated courtship display in male zebra finches is the seamless and  
216 rapid transition from innate motor programs, including those for female-directed orientation, pursuit  
217 and calling, to the learned motor program that patterns the motif. The anatomical and functional  
218 studies undertaken here illuminate how the midbrain A11 can act as a central hub to enable such  
219 seamless and rapid motor integration (schematized in Figure 6). To successfully court a female, the  
220 male produces song bouts comprising extended and tightly interwoven sequences of innate  
221 introductory notes and learned song syllables, generated with millisecond precision over many seconds  
222 (Woolley & Doupe, 2008). The present fiber photometry findings point to the ascending projections  
223 from A11 to HVC as a major source of information about female-directed innate vocalizations,  
224 presumably mediated by its input from call production centers in the ICo (Figure 1F), that help to  
225 precisely time the transition between innate and learned vocalizations and enhance the potency of  
226 sexual signaling. While A11 is active during both female-directed and undirected singing, A11 terminal  
227 activity in HVC peaks earlier relative to motif onset and c-fos expression in A11 cell bodies is more  
228 elevated during female-directed song. This shift in the timing and magnitude of A11 activity parallels a  
229 shift in A11's functional influence on song, as determined by 6-OHDA lesions and DA receptor  
230 microdialysis experiments, with A11 playing an obligatory, leading role to drive directed singing and  
231 merely a facilitatory role in undirected singing. More generally, because A11 and HVC are part of a  
232 recurrent network (Hamaguchi & Mooney, 2012), our findings may point to how song production shifts  
233 from bottom-up control during encounters with a female to top-down control when the male vocalizes  
234 in social isolation.

235

236 Prior studies have detected that the often-subtle acoustic features that distinguish female-directed song  
237 from undirected song greatly enhance its salience as a sexual signal (Houtman, 1992; Woolley & Doupe,  
238 2008). A reasonable idea is that these acoustic differences can be attributed to the male's sexual



239 motivation and arousal (Riters et al., 2000). As suggested by a recent study in canaries (Haakenson et al.,  
240 2020), the projections from the POM to A11 provide a plausible pathway for sexual motivation and  
241 arousal signals to reach forebrain song circuitry, while also accounting for the elevated A11 activity that  
242 occurs in adult males producing female-directed songs (Figure 5 – supplementary figure 4A-C and  
243 Bharati & Goodson, 2006). Moreover, our finding of the selective role that A11's projections to HVC  
244 play in triggering the directed but not undirected song motif (Figure 3) underscores that the circuitry  
245 that promotes these two types of singing is at least partially distinct (Walters et al., 1991).

246

247 The midbrain A11 cell group in mammals, the likely homologue of the songbird midbrain A11 (Anton  
248 Reiner et al., 1994; Kingsbury et al., 2011), is implicated in various innate appetitive and consummatory  
249 aspects of reproduction through its descending projections to motor centers in the brainstem and spinal  
250 cord (Giuliano & Allard, 2001). The present results show how this ancestral reproductive structure has  
251 expanded to incorporate a learned behavior into the male's holistic courtship display via its ascending  
252 projections to song premotor circuitry in the forebrain. The evolutionarily ancient nature of A11 raises  
253 the possibility that it serves a similar function in other species that depend on such complex motor  
254 integration during courtship, including our own.

255

256

257 **Materials and Methods**

258 **Data reporting.** No statistical methods were used to predetermine sample size. The experiments  
259 were not randomized and the investigators were not blinded to allocation during experiments and  
260 outcome assessment.

261 **Animal model.** Adult males and adult females (>105 days old) zebra finches (*Taeniopygia guttata*)  
262 were obtained from the Duke University Medical Center breeding facility. All experimental procedures  
263 were in accordance with the NIH guidelines and approved by the Duke University Medical Center Animal  
264 Care and Use Committee. Birds were kept under a 14:10-hr light:dark cycle with free access to food and  
265 water. Data were collected from 50 adult male zebra finches.

266 **Tissue collection.** Birds were deeply anesthetized with intramuscular injection of 20  $\mu$ l Euthasol  
267 (Virbac), and transcardially perfused with 0.025 M phosphate-buffered saline (PBS) followed by 4%  
268 paraformaldehyde (PFA). Brains were removed, post-fixed in 4% PFA at 4°C overnight and moved to  
269 cryoprotective 30% sucrose PFA solution for two days. Frozen sagittal sections (thickness of 50 or  
270 75  $\mu$ m) were prepared with a sledge microtome (Reichert) and collected in PBS.

271 **Immunofluorescence.** Floating sections were washed three times in PBS, permeabilized with 0.3%  
272 Triton X-100 in PBS (PBST) for 10 minutes and incubated with rabbit primary antibody against TH  
273 (1:1000, AB152; Millipore/Sigma) at 4°C overnight. Sections were then washed three times in PBS and  
274 incubated with anti-rabbit secondary antibody (1:500; Jackson ImmunoResearch) in PBS at room  
275 temperature for 2-4 h, followed by three washes in PB. Sections were coverslipped with Fluoromount-G  
276 (SouthernBiotech), and then imaged with a confocal microscope (Zeiss) through a 20x or 10x objective  
277 lens controlled by Zen software (Zeiss). To label A11 projections and inputs, AAV2/9.CAG-scGFP (made in  
278 lab), dextran (Alexa Fluor 488, D-22910, ThermoFisher) or retrobeads (LumaFluor) were injected into the  
279 A11 of adult male birds 4–7 days before perfusion. Images were processed with ImageJ to adjust for

280 contrast. For the analysis of TH<sup>+</sup> neurons in A11 after 6-OHDA treatments, neurons with diameter  
281 greater than 10 μm were counted manually.

282 **Floating section *in situ* hybridization chain reaction (HCR).** Birds were perfused with 4%PFA/PBS  
283 and postfixed in the same solution overnight and then in 30% sucrose in DEPC-PBS for 2 overnights at  
284 4°C. Brains were then sectioned at 75 μm and collected into 0.5-1% PFA (4% PFA diluted in RNase-free  
285 PBS). At room temperature, slices were first washed twice in PBS for 3 min, incubated in 5% SDS/PBS for  
286 45 min, rinsed twice with 2x sodium chloride sodium citrate 0.1% Tween 20 (2x SSCT), and then were  
287 put in 2x SSCT for 15 min on a shaker. Then they were hybridized in 2.5 μL probe set/500 μl probe  
288 hybridization buffer overnight at 37°C. The probes were custom made by Molecular Instruments to  
289 detect zebra finch isoforms of vGluT2, TH, and VGAT. The next day, slices were washed four times for 15  
290 min with 500 μL of probe wash buffer at 37°C and twice in 2x SSCT for 5 min at room temperature on a  
291 shaker. Then they were incubated in 500 μl of HCR amplification buffer for 30 min at room temperature  
292 on a shaker. Last, slices were incubated in a solution containing 300 μL HCR amplification buffer and  
293 fluorescent hairpins for the HCR initiator probe for 2 overnights, in the dark at 25°C. On the last day, at  
294 room temperature, slices were washed twice with 2x SSCT for 5 min, stained with Neurotrace for 2  
295 hours (1:500, N21479; Invitrogen), rinsed twice with 2x SSCT and mounted on a slide with Fluoromount-  
296 G. Hairpins, probe sets and probe hybridization buffer were created by Molecular Instruments. HCR for  
297 TH and vGluT2 was performed on sections from 4 birds, HCR for TH and VGAT was performed on  
298 sections from 2 birds, and HCR for TH, vGluT2 and VGAT was performed on sections from 1 bird.

299 **Lesion experiments.** A pair of male and female adult zebra finches were housed in an isolated  
300 soundproof box. The male and the female were separated by electronic glass (HOHOFILM Electronic  
301 PDLC, Smart Film) that was connected to an external switch. When powered off, this glass is opaque,  
302 preventing the male and the female from seeing each other. In order to record female-directed singing,  
303 the experimenter powered the glass on, rendering it transparent and enabling the birds to see each

304 other. The use of electronic glass eliminated the need to handle the birds, increasing the probability that  
305 the males would sing to the female. Video recordings started approximately 20 seconds prior to  
306 visibility onset. The glass remained transparent for 1-7 minutes. Video recordings stopped  
307 approximately 20 seconds after visibility offset. Baseline singing rates were recorded for 5-7 days, after  
308 which birds were divided into 4 experimental groups, HVC 6-OHDA, HVC sham, A11 6-OHDA, and A11  
309 sham (Figure 1 K). Videos of the birds were recorded using webcams (Genius WideCam F100). Songs  
310 were automatically recorded with Sound Analysis Pro (SAP2011<sup>33</sup>). Singing rates were calculated  
311 manually by counting all female-directed songs produced during the first minute of female presentation  
312 and by counting all undirected songs produced during a 4-hour period each day. Female-directed and  
313 undirected song rates were calculated for five days prior to surgery. An average singing rate over this  
314 baseline period was calculated and then used to normalize singing rates for each day pre- and post-  
315 surgery. Vocalizations of >5 ms were detected by amplitude thresholding of the recorded sounds.  
316 Pairwise similarity scores (asymmetrical similarity) between either song motifs or introductory notes  
317 from pre-treatment days and post-treatment days were calculated using SAP2011<sup>33</sup> with default  
318 parameters for zebra finches.

319 **Terminal deoxynucleotidyl transferase-mediated dUTP nick-end labeling (TUNEL) assay.** Birds  
320 lesioned in HVC with 6-OHDA were perfused, and brain sections were collected as described in the  
321 previous sections. Detection of apoptosis was carried out with some modifications to the DeadEnd™  
322 Colorimetric TUNEL System (Promega). Briefly, free-floating sections were fixed in 4% PFA for 15 mins.,  
323 and washed three times with PBS at room temperature. The sections were digested in a Proteinase K  
324 solution (20ug/ml) for 10-15 mins., followed by three PBS washes and an additional fixation step. The  
325 samples were placed on a shaker at room temperature in an equilibration buffer for 10 mins., followed  
326 by an incubation step with a biotinylated nucleotide mix and rTdT enzyme in a 37°C humidified chamber  
327 for 1 hour. The sections were washed once with 2xSSC for 15 mins., and three times with PBS. Then,

328 they were incubated for 60 mins. at room temperature with AlexaFluor 488- streptavidin (1:500,  
329 ThermoFisher) and washed 3 times with PB before mounting.

330 **Video analysis.** Videos were analyzed for 20 seconds prior to female presentation and 30 seconds  
331 after female presentation. For each video, the bird's position and head orientation were measured using  
332 either DeepLabCut (Mathis et al., 2018) or custom MATLAB graphical user interfaces (M. Ben-Tov) that  
333 enable the marking of the bird's body position and head orientation across video frames. For each  
334 video, the position was normalized to the cage size, to allow a comparison between different videos and  
335 birds.

336 **General surgery.** Adult male birds were anesthetized with 1%–2% isoflurane inhalation and placed  
337 in a stereotaxic device on a heat blanket. Stereotaxic coordinates and multiunit recordings were used to  
338 localize target sites for injection and implantation. Stereotaxic coordinates, measured from the  
339 bifurcation of the midsagittal sinus, were 0.0 mm rostral, 2.4 mm lateral and 0.5 mm ventral (head angle  
340 of 18°) for HVC and 3.4 mm rostral, 0.7 mm lateral and 6.1 mm ventral (head angle of 62°) or 0.35  
341 caudal, 0.7 mm lateral and 5.15 ventral (head angle of 22°) for A11. Reagents (Dextran, Alexa Fluor 488,  
342 594 or 647, Invitorgen; RetroBeads 590, Lumafuor) or viruses were injected using Nanoject-II  
343 (Drummond Scientific). Viral injections were performed bilaterally with a volume of 300–1000 nL per  
344 hemisphere. Viruses and plasmids were obtained from the Penn Vector Core (Pennsylvania, USA) and  
345 the UNC Vector Core (Chapel Hill, USA).

346 **Injection of 6-OHDA.** Adult male birds received bilateral injections of either 400nl 6-OHDA solution  
347 into HVC or 80-100nl 6-OHDA solution into A11 (N=4 for A11 and N=5 HVC). The solution was PBS-based  
348 and included 10-60 mM 6-OHDA hydrochloride (Tocris, 2547), 10  $\mu$ M l-ascorbic acid (Millipore/Sigma,  
349 A92902), and 1  $\mu$ M desipramine hydrochloride (Tocris, 3067), which was included as an inhibitor for  
350 noradrenaline and serotonin transporters to protect noradrenergic and serotonergic neuron terminals  
351 at the injection site. Control birds received an injection of PBS with 10  $\mu$ M ascorbic acid and 1  $\mu$ M

352 desipramine (N=6 for A11 sham group and N=5 for HVC sham group). Drugs were dissolved in PBS  
353 immediately before injection in place of equimolar NaCl (working solution: ~300 mOsm, pH 7.3). After  
354 injection, birds were returned to their original home cage until approximately 14 days post injection.

355 **Microdialysis infusion of drugs.** Adult male birds were implanted bilaterally with custom-made  
356 microdialysis probes and then housed individually in an acoustic sound-proof box. Beginning two days  
357 later, saline or dopamine blocker were infused on alternate days into HVC at light onset (D1-type  
358 blocker: 5 mM R(+)-SCH-23390 hydrochloride, Millipore/Sigma, D054, D2-type blocker: 5 mM S(-)-  
359 sulpiride, Tocris, 0895). Songs were recorded starting an hour after the infusion for three hours total.  
360 Female-directed songs were collected by introducing a female for one-minute sessions, 4-5 sessions per  
361 day. Song counts were calculated for 7 birds (D1-type blocker) and 2 birds (D1-type and D2-type  
362 blockers), in 3 saline days and 2 dopamine blockers days.

363 **Fiber photometry imaging.** Adult male birds were injected with pAAV-hSynapsin1-axon-GCaMP6s-  
364 P2A-mRuby3 (axon-target GCaMP6s) bilaterally into A11 or HVC. After waiting a minimum of 3 weeks for  
365 viral expression, birds were anesthetized and placed in a stereotaxic apparatus. Bilateral craniotomies  
366 were made over HVC and fiber optic ferrules (200 um core, 0.37 NA, Neurophotometrics) were  
367 implanted. For all recordings, axon-targeted GCaMP6s was excited at two wavelengths (470nm for  
368 imaging of calcium-dependent signals and 415nm for an interleaved isosbestic control to eliminate  
369 motion artifacts). An sCMOS camera was used to capture fluorescence (FP3001, Neurophotometrics) at  
370 30 Hz. Synchronized video and sound recordings were acquired using a webcam (Logitech). Data  
371 acquisition was performed with custom Bonsai code and data analyzed using custom-written Matlab  
372 scripts. In each imaging session, the signal from the isosbestic control channel was first smoothed and  
373 then regressed to the signal from the calcium-dependent channel. To calculate the calcium-dependent  
374 signal, first the linear model generated from regression was used to generate a predicted control signal.  
375 Then the calcium-dependent signal was calculated by subtracting the predicted control signal from the

376 raw calcium-dependent signal (Figure. S3). Audio recordings were filtered using a third-order median  
377 filter. Introductory notes, syllables and different types of calls were labeled manually in Matlab. Calcium  
378 signals were aligned to the audio recordings and then z-scored to normalized changes in fluorescence  
379 across animals.

380 **Hybridization chain reaction for identification of Fos expression.** In order to minimize off-target  
381 Fos mRNA detection, birds were perfused 30 minutes after cage lights first turned on in the morning. For  
382 female-directed singing (n = 4 birds), 4-5 females were presented sequentially to maximize motif  
383 amounts. Live video was monitored to ensure no significant undirected (facing away from the female,  
384 disengaged) singing occurred during female presentations. For the undirected condition (n = 4 birds),  
385 birds were allowed to sing freely in the morning for the 30-minute window. Lights were then turned off  
386 and birds were immediately perfused. Brains were processed for HCR as described in a previous section,  
387 the custom probes designed by Molecular Instruments targeted Fos, TH and VGAT. For each bird, a z-  
388 stack encompassing A11 was collected at 40x power to accurately visualize Fos signal, along with a  
389 TH channel. All image processing was done with ImageJ. First, the TH and Fos channels were noise-  
390 subtracted (20  $\mu\text{m}$  rolling ball radius), and TH channel was smoothed, automatically thresholded (otsu  
391 method), and converted to a binarized mask. The mask was then transferred to the Fos channel, which  
392 was then also thresholded. Fos particles within the TH mask were then quantified for intensity  
393 (expressed as a fraction of the TH mask).

394 **Statistics.** Data are shown as mean  $\pm$  s.e.m., unless otherwise noted. One-way ANOVAs, two-ways  
395 ANOVAs, and their corresponding post-hoc comparisons were performed on Prism (GraphPad). T-tests  
396 were performed in Matlab. To examine the different proportion of labelled neurons in the A11,  $\chi^2$  tests  
397 were performed (Figure 2B,C,E,F). A paired t-test was used to examine the effect of 6-OHDA in HVC and  
398 in A11 on the production of female-directed and undirected singing rates (Figure 3K). A t-test was used  
399 to compared female-directed singing between 6-OHDA and sham injections in HVC and in A11 (Figure

400 3K). Two-way repeated measurements ANOVA ( $p(\text{Interaction}) < 0.0001$ , followed by Bonferroni's multiple  
401 comparisons test was performed to examine 6-OHDA treatment effect on the production of  
402 introductory notes (Figure 4B). A t-test was used to test for a significant effect of 6-OHDA treatment in  
403 HVC or in A11 on the movement towards the female (Figure 4D) and on overall movement (Figure 4E).  
404 One-way ANOVAs were performed to examine whether 6-OHDA injections abolished A11 neurons ( $F_{2,9} =$   
405  $13.70$ ,  $p = 0.0019$  and  $F_{2,9} = 9.18$ ,  $p = 0.0067$ ; Figure 3 – supplement figure 1D and 1E). One-way repeated  
406 measurement ANOVAs were performed to examine the effect of 6-OHDA treatment on the pairwise  
407 similarities between song motifs and introductory notes for the HVC group and song motifs for the A11  
408 group (for the HVC 6-OHDA song motifs:  $F_{2,8} = 6.751$ ,  $p < 0.05$ , followed by post-hoc Tukey test, asterisk  
409 denotes  $p < 0.05$ ; Figure 3 – supplement figure 2I and Figure 4 – supplement figure 1D). A mixed-effect  
410 analysis was used to test for a significant difference in peak response time in calcium signals between  
411 A11 terminals in HVC and HVC local axons, in female-directed and undirected singing (mixed-effects  
412 analysis,  $p(\text{interaction}) = 0.0226$ .  $p = 0.0002$  and  $p = 0.011$  for A11 axons and HVC axons in directed singing,  
413 and A11 axons in directed and undirected singing, respectively; Figure 5K). A t-test was used to test the  
414 rise time relative to first introductory note difference between the A11 axons group and the HVC axons  
415 group (Figure 5 – supplementary figure 3B). A t-test was used to test the ratio of Fos positive TH positive  
416 cells in A11 during female-directed and undirected song,  $p = 0.0033$  (Figure 5 – supplementary figure 4C).  
417  
418



419 **Acknowledgements**

420 We thank Fan Wang, Kevin Franks, Masashi Tanaka, Katherine Tschida, Audrey Mercer and Thomas  
421 Pomberger for critical discussion and for reading earlier versions of this manuscript.

422

423 **Competing interests**

424 The authors declare no competing interests

425

426 **References**

- 427 Anton Reiner, Karle, E. J., Anderson, K. D., & Medina, L. (1994). Catecholaminergic perikarya and fibers in  
428 the avian nervous system. In *Phylogeny and Development of Catecholamine Systems in the CNS*  
429 *of Vertebrates* (pp. 135–182). Cambridge University Press.
- 430 Appeltants, D., Absil, P., Balthazart, J., & Ball, G. F. (2000). Identification of the origin of  
431 catecholaminergic inputs to HVC in canaries by retrograde tract tracing combined with tyrosine  
432 hydroxylase immunocytochemistry. *Journal of Chemical Neuroanatomy*, *18*(3), 117–133.  
433 [https://doi.org/10.1016/S0891-0618\(99\)00054-X](https://doi.org/10.1016/S0891-0618(99)00054-X)
- 434 Aronov, D., Andalman, A. S., & Fee, M. S. (2008). A specialized forebrain circuit for vocal babbling in the  
435 juvenile songbird. *Science (New York, N.Y.)*, *320*(5876), 630–634.  
436 <https://doi.org/10.1126/science.1155140>
- 437 Ball, G. F., & Balthazart, J. (2004). Hormonal regulation of brain circuits mediating male sexual behavior  
438 in birds. *Physiology & Behavior*, *83*(2), 329–346. <https://doi.org/10.1016/j.physbeh.2004.08.020>
- 439 Balthazart, J., & Absil, P. (1997). Identification of catecholaminergic inputs to and outputs from  
440 aromatase-containing brain areas of the Japanese quail by tract tracing combined with tyrosine  
441 hydroxylase immunocytochemistry. *The Journal of Comparative Neurology*, *382*(3), 401–428.
- 442 Benichov, J. I., Benezra, S. E., Vallentin, D., Globerson, E., Long, M. A., & Tchernichovski, O. (2016). The  
443 Forebrain Song System Mediates Predictive Call Timing in Female and Male Zebra Finches.  
444 *Current Biology: CB*, *26*(3), 309–318. <https://doi.org/10.1016/j.cub.2015.12.037>
- 445 Benichov, J. I., & Vallentin, D. (2020). Inhibition within a premotor circuit controls the timing of vocal  
446 turn-taking in zebra finches. *Nature Communications*, *11*(1), 221.  
447 <https://doi.org/10.1038/s41467-019-13938-0>

- 448 Bharati, I. S., & Goodson, J. L. (2006). Fos responses of dopamine neurons to sociosexual stimuli in male  
449 zebra finches. *Neuroscience*, *143*(3), 661–670.  
450 <https://doi.org/10.1016/j.neuroscience.2006.08.046>
- 451 Broussard, G. J., Liang, Y., Fridman, M., Unger, E. K., Meng, G., Xiao, X., Ji, N., Petreanu, L., & Tian, L.  
452 (2018). In vivo measurement of afferent activity with axon-specific calcium imaging. *Nature*  
453 *Neuroscience*, *21*(9), 1272–1280. <https://doi.org/10.1038/s41593-018-0211-4>
- 454 Cai, Y., & Ford, C. P. (2018). Dopamine Cells Differentially Regulate Striatal Cholinergic Transmission  
455 across Regions through Corelease of Dopamine and Glutamate. *Cell Reports*, *25*(11), 3148-  
456 3157.e3. <https://doi.org/10.1016/j.celrep.2018.11.053>
- 457 Choi, H. M. T., Schwarzkopf, M., Fornace, M. E., Acharya, A., Artavanis, G., Stegmaier, J., Cunha, A., &  
458 Pierce, N. A. (2018). Third-generation *in situ* hybridization chain reaction: Multiplexed,  
459 quantitative, sensitive, versatile, robust. *Development*, *145*(12), dev165753.  
460 <https://doi.org/10.1242/dev.165753>
- 461 Coddington, L. T., & Dudman, J. T. (2018). The timing of action determines reward prediction signals in  
462 identified midbrain dopamine neurons. *Nature Neuroscience*, *21*(11), 1563–1573.  
463 <https://doi.org/10.1038/s41593-018-0245-7>
- 464 da Silva, J. A., Tecuapetla, F., Paixão, V., & Costa, R. M. (2018). Dopamine neuron activity before action  
465 initiation gates and invigorates future movements. *Nature*, *554*(7691), 244–248.  
466 <https://doi.org/10.1038/nature25457>
- 467 Daliparthi, V. K., Tachibana, R. O., Cooper, B. G., Hahnloser, R. H., Kojima, S., Sober, S. J., & Roberts, T. F.  
468 (2019). Transitioning between preparatory and precisely sequenced neuronal activity in  
469 production of a skilled behavior. *ELife*, *8*. <https://doi.org/10.7554/eLife.43732>

- 470 Daubner, S. C., Le, T., & Wang, S. (2011). Tyrosine hydroxylase and regulation of dopamine synthesis.  
471 *Archives of Biochemistry and Biophysics*, 508(1), 1–12.  
472 <https://doi.org/10.1016/j.abb.2010.12.017>
- 473 Demir, E., Li, K., Bobrowski-Khoury, N., Sanders, J. I., Beynon, R. J., Hurst, J. L., Kepecs, A., & Axel, R.  
474 (2020). The pheromone darcin drives a circuit for innate and reinforced behaviours. *Nature*,  
475 578(7793), 137–141. <https://doi.org/10.1038/s41586-020-1967-8>
- 476 Dickson, B. J. (2008). Wired for Sex: The Neurobiology of *Drosophila* Mating Decisions. *Science*,  
477 322(5903), 904–909. <https://doi.org/10.1126/science.1159276>
- 478 Eales, L. A. (1985). Song learning in zebra finches: Some effects of song model availability on what is  
479 learnt and when. *Animal Behaviour*, 33(4), 1293–1300. <https://doi.org/10.1016/S0003->  
480 3472(85)80189-5
- 481 Egger, R., Tupikov, Y., Elmaleh, M., Katlowitz, K. A., Benezra, S. E., Picardo, M. A., Moll, F., Kornfeld, J.,  
482 Jin, D. Z., & Long, M. A. (2020). Local Axonal Conduction Shapes the Spatiotemporal Properties  
483 of Neural Sequences. *Cell*, 183(2), 537-548.e12. <https://doi.org/10.1016/j.cell.2020.09.019>
- 484 El Mestikawy, S., Wallén-Mackenzie, Å., Fortin, G. M., Descarries, L., & Trudeau, L.-E. (2011). From  
485 glutamate co-release to vesicular synergy: Vesicular glutamate transporters. *Nature Reviews*  
486 *Neuroscience*, 12(4), 204–216. <https://doi.org/10.1038/nrn2969>
- 487 Fukushima, Y., & Aoki, K. (2000). The Role of the Dorsomedial Nucleus (DM) of Intercollicular Complex  
488 with Regard to Sexual Difference of Distance Calls in Bengalese Finches. *Zoological Science*,  
489 17(9), 1231–1238. <https://doi.org/10.2108/zsj.17.1231>
- 490 Gahr, M. (2001). Distribution of sex steroid hormone receptors in the avian brain: Functional  
491 implications for neural sex differences and sexual behaviors. *Microscopy Research and*  
492 *Technique*, 55(1), 1–11. <https://doi.org/10.1002/jemt.1151>

- 493 Giuliano, F., & Allard, J. (2001). Dopamine and sexual function. *International Journal of Impotence*  
494 *Research*, 13(S3), S18–S28. <https://doi.org/10.1038/sj.ijir.3900719>
- 495 Goodson, J. L., Kabelik, D., Kelly, A. M., Rinaldi, J., & Klatt, J. D. (2009). Midbrain dopamine neurons  
496 reflect affiliation phenotypes in finches and are tightly coupled to courtship. *Proceedings of the*  
497 *National Academy of Sciences*, 106(21), 8737–8742. <https://doi.org/10.1073/pnas.0811821106>
- 498 Haakenson, C. M., Balthazart, J., & Ball, G. F. (2020). Effects of Inactivation of the Periaqueductal Gray on  
499 Song Production in Testosterone-Treated Male Canaries ( *Serinus canaria* ). *ENEURO*,  
500 ENEURO.0048-20.2020. <https://doi.org/10.1523/ENEURO.0048-20.2020>
- 501 Hahnloser, R. H. R., Kozhevnikov, A. A., & Fee, M. S. (2002). An ultra-sparse code underlies the  
502 generation of neural sequences in a songbird. *Nature*, 419(6902), 65–70.  
503 <https://doi.org/10.1038/nature00974>
- 504 Hamaguchi, K., & Mooney, R. (2012). Recurrent Interactions between the Input and Output of a  
505 Songbird Cortico-Basal Ganglia Pathway Are Implicated in Vocal Sequence Variability. *Journal of*  
506 *Neuroscience*, 32(34), 11671–11687. <https://doi.org/10.1523/JNEUROSCI.1666-12.2012>
- 507 Hamaguchi, Kosuke, Tanaka, M., & Mooney, R. (2016). A Distributed Recurrent Network Contributes to  
508 Temporally Precise Vocalizations. *Neuron*, 91(3), 680–693.  
509 <https://doi.org/10.1016/j.neuron.2016.06.019>
- 510 Hoffmann, L. A., Saravanan, V., Wood, A. N., He, L., & Sober, S. J. (2016). Dopaminergic Contributions to  
511 Vocal Learning. *The Journal of Neuroscience: The Official Journal of the Society for Neuroscience*,  
512 36(7), 2176–2189. <https://doi.org/10.1523/JNEUROSCI.3883-15.2016>
- 513 Houtman, A. M. (1992). Female zebra finches choose extra-pair copulations with genetically attractive  
514 males. *Proceedings of the Royal Society of London. Series B: Biological Sciences*, 249(1324), 3–6.  
515 <https://doi.org/10.1098/rspb.1992.0075>
- 516 Immelmann, Klaus. (1971). *Australian finches in bush and aviary*. Angus and Robertson.

- 517 Izawa, J., Criscimagna-Hemminger, S. E., & Shadmehr, R. (2012). Cerebellar contributions to reach  
518 adaptation and learning sensory consequences of action. *The Journal of Neuroscience: The*  
519 *Official Journal of the Society for Neuroscience*, *32*(12), 4230–4239.  
520 <https://doi.org/10.1523/JNEUROSCI.6353-11.2012>
- 521 Keleman, K., Vrontou, E., Krüttner, S., Yu, J. Y., Kurtovic-Kozaric, A., & Dickson, B. J. (2012). Dopamine  
522 neurons modulate pheromone responses in *Drosophila* courtship learning. *Nature*, *489*(7414),  
523 145–149. <https://doi.org/10.1038/nature11345>
- 524 Kingsbury, M. A., Kelly, A. M., Schrock, S. E., & Goodson, J. L. (2011). Mammal-Like Organization of the  
525 Avian Midbrain Central Gray and a Reappraisal of the Intercollicular Nucleus. *PLoS ONE*, *6*(6),  
526 e20720. <https://doi.org/10.1371/journal.pone.0020720>
- 527 Long, M. A., & Fee, M. S. (2008). Using temperature to analyse temporal dynamics in the songbird motor  
528 pathway. *Nature*, *456*(7219), 189–194. <https://doi.org/10.1038/nature07448>
- 529 Long, M. A., Jin, D. Z., & Fee, M. S. (2010). Support for a synaptic chain model of neuronal sequence  
530 generation. *Nature*, *468*(7322), 394–399. <https://doi.org/10.1038/nature09514>
- 531 Mathis, A., Mamidanna, P., Cury, K. M., Abe, T., Murthy, V. N., Mathis, M. W., & Bethge, M. (2018).  
532 DeepLabCut: Markerless pose estimation of user-defined body parts with deep learning. *Nature*  
533 *Neuroscience*, *21*(9), 1281–1289. <https://doi.org/10.1038/s41593-018-0209-y>
- 534 McCasland, J. S., & Konishi, M. (1981). Interaction between auditory and motor activities in an avian  
535 song control nucleus. *Proceedings of the National Academy of Sciences*, *78*(12), 7815–7819.  
536 <https://doi.org/10.1073/pnas.78.12.7815>
- 537 McIntire, S. L., Reimer, R. J., Schuske, K., Edwards, R. H., & Jorgensen, E. M. (1997). Identification and  
538 characterization of the vesicular GABA transporter. *Nature*, *389*(6653), 870–876.  
539 <https://doi.org/10.1038/39908>

- 540 Mohebi, A., Pettibone, J. R., Hamid, A. A., Wong, J.-M. T., Vinson, L. T., Patriarchi, T., Tian, L., Kennedy, R.  
541 T., & Berke, J. D. (2019). Dissociable dopamine dynamics for learning and motivation. *Nature*,  
542 570(7759), 65–70. <https://doi.org/10.1038/s41586-019-1235-y>
- 543 Nieder, A., & Mooney, R. (2020). The neurobiology of innate, volitional and learned vocalizations in  
544 mammals and birds. *Philosophical Transactions of the Royal Society B: Biological Sciences*,  
545 375(1789), 20190054. <https://doi.org/10.1098/rstb.2019.0054>
- 546 Nottebohm, F., Stokes, T. M., & Leonard, C. M. (1976). Central control of song in the canary, *Serinus*  
547 *canarius*. *The Journal of Comparative Neurology*, 165(4), 457–486.  
548 <https://doi.org/10.1002/cne.901650405>
- 549 Ottoni, E. B., & Izar, P. (2008). Capuchin monkey tool use: Overview and implications. *Evolutionary*  
550 *Anthropology: Issues, News, and Reviews*, 17(4), 171–178. <https://doi.org/10.1002/evan.20185>
- 551 Price, P. H. (1979). Developmental determinants of structure in zebra finch song. *Journal of Comparative*  
552 *and Physiological Psychology*, 93(2), 260–277. <https://doi.org/10.1037/h0077553>
- 553 Proville, R. D., Spolidoro, M., Guyon, N., Dugué, G. P., Selimi, F., Isope, P., Popa, D., & Léna, C. (2014).  
554 Cerebellum involvement in cortical sensorimotor circuits for the control of voluntary  
555 movements. *Nature Neuroscience*, 17(9), 1233–1239. <https://doi.org/10.1038/nn.3773>
- 556 Riotte-Lambert, L., & Weimerskirch, H. (2013). Do naive juvenile seabirds forage differently from adults?  
557 *Proceedings of the Royal Society B: Biological Sciences*, 280(1768), 20131434.  
558 <https://doi.org/10.1098/rspb.2013.1434>
- 559 Ritters, L. V., & Alger, S. J. (2004). Neuroanatomical evidence for indirect connections between the  
560 medial preoptic nucleus and the song control system: Possible neural substrates for sexually  
561 motivated song. *Cell and Tissue Research*, 316(1), 35–44. [https://doi.org/10.1007/s00441-003-](https://doi.org/10.1007/s00441-003-0838-6)  
562 0838-6

- 563 Ritters, L. V., Eens, M., Pinxten, R., Duffy, D. L., Balthazart, J., & Ball, G. F. (2000). Seasonal Changes in  
564 Courtship Song and the Medial Preoptic Area in Male European Starlings (*Sturnus vulgaris*).  
565 *Hormones and Behavior*, 38(4), 250–261. <https://doi.org/10.1006/hbeh.2000.1623>
- 566 Seller, T. J. (1981). Midbrain vocalization centres in birds. *Trends in Neurosciences*, 4, 301–303.  
567 [https://doi.org/10.1016/0166-2236\(81\)90094-1](https://doi.org/10.1016/0166-2236(81)90094-1)
- 568 Simpson, H., & Vicario, D. (1990). Brain pathways for learned and unlearned vocalizations differ in zebra  
569 finches. *The Journal of Neuroscience*, 10(5), 1541–1556. [https://doi.org/10.1523/JNEUROSCI.10-](https://doi.org/10.1523/JNEUROSCI.10-05-01541.1990)  
570 [05-01541.1990](https://doi.org/10.1523/JNEUROSCI.10-05-01541.1990)
- 571 Smeets, W. J. A. J., & González, A. (2000). Catecholamine systems in the brain of vertebrates: New  
572 perspectives through a comparative approach. *Brain Research Reviews*, 33(2–3), 308–379.  
573 [https://doi.org/10.1016/S0165-0173\(00\)00034-5](https://doi.org/10.1016/S0165-0173(00)00034-5)
- 574 Sossinka, R., & Böhner, J. (1980). Song Types in the Zebra Finch *Poephila guttata castanotis*<sup>1</sup>. *Zeitschrift*  
575 *Für Tierpsychologie*, 53(2), 123–132. <https://doi.org/10.1111/j.1439-0310.1980.tb01044.x>
- 576 Steeves, J. D., Sholomenko, G. N., & Webster, D. M. (1987). Stimulation of the pontomedullary reticular  
577 formation initiates locomotion in decerebrate birds. *Brain Research*, 401(2), 205–212.  
578 [https://doi.org/10.1016/0006-8993\(87\)91406-5](https://doi.org/10.1016/0006-8993(87)91406-5)
- 579 Stuber, G. D., Hnasko, T. S., Britt, J. P., Edwards, R. H., & Bonci, A. (2010). Dopaminergic Terminals in the  
580 Nucleus Accumbens But Not the Dorsal Striatum Corelease Glutamate. *Journal of Neuroscience*,  
581 30(24), 8229–8233. <https://doi.org/10.1523/JNEUROSCI.1754-10.2010>
- 582 Trainor, B. C., Bird, I. M., Alday, N. A., Schlinger, B. A., & Marler, C. A. (2003). Variation in Aromatase  
583 Activity in the Medial Preoptic Area and Plasma Progesterone Is Associated with the Onset of  
584 Paternal Behavior. *Neuroendocrinology*, 78(1), 36–44. <https://doi.org/10.1159/000071704>



- 585 Tritsch, N. X., Ding, J. B., & Sabatini, B. L. (2012). Dopaminergic neurons inhibit striatal output through  
586 non-canonical release of GABA. *Nature*, *490*(7419), 262–266.  
587 <https://doi.org/10.1038/nature11466>
- 588 Tritsch, N. X., Oh, W.-J., Gu, C., & Sabatini, B. L. (2014). Midbrain dopamine neurons sustain inhibitory  
589 transmission using plasma membrane uptake of GABA, not synthesis. *ELife*, *3*, e01936.  
590 <https://doi.org/10.7554/eLife.01936>
- 591 Ullrich, R., Norton, P., & Scharff, C. (2016). Waltzing Taeniopygia: Integration of courtship song and  
592 dance in the domesticated Australian zebra finch. *Animal Behaviour*, *112*, 285–300.  
593 <https://doi.org/10.1016/j.anbehav.2015.11.012>
- 594 Vu, E. T., Schmidt, M. F., & Mazurek, M. E. (1998). Interhemispheric Coordination of Premotor Neural  
595 Activity during Singing in Adult Zebra Finches. *The Journal of Neuroscience*, *18*(21), 9088–9098.  
596 <https://doi.org/10.1523/JNEUROSCI.18-21-09088.1998>
- 597 Walters, M. J., Collado, D., & Harding, C. F. (1991). Oestrogenic modulation of singing in male zebra  
598 finches: Differential effects on directed and undirected songs. *Animal Behaviour*, *42*(3), 445–  
599 452. [https://doi.org/10.1016/S0003-3472\(05\)80043-0](https://doi.org/10.1016/S0003-3472(05)80043-0)
- 600 Webster, D. M. S., & Steeves, J. D. (1991). Funicular organization of avian brainstem-spinal projections.  
601 *The Journal of Comparative Neurology*, *312*(3), 467–476.  
602 <https://doi.org/10.1002/cne.903120312>
- 603 Webster, Deirdre M. S., & Steeves, J. D. (1988). Origins of brainstem-spinal projections in the duck and  
604 goose. *The Journal of Comparative Neurology*, *273*(4), 573–583.  
605 <https://doi.org/10.1002/cne.902730411>
- 606 Wild, J. M., Li, D., & Eagleton, C. (1997). Projections of the dorsomedial nucleus of the intercollicular  
607 complex (DM) in relation to respiratory-vocal nuclei in the brainstem of pigeon (*Columba livia*)

608 and zebra finch (*Taeniopygia guttata*). *The Journal of Comparative Neurology*, 377(3), 392–413.  
609 [https://doi.org/10.1002/\(sici\)1096-9861\(19970120\)377:3<392::aid-cne7>3.0.co;2-y](https://doi.org/10.1002/(sici)1096-9861(19970120)377:3<392::aid-cne7>3.0.co;2-y)

610 Wild, J. Martin. (1993). The avian nucleus retroambigualis: A nucleus for breathing, singing and calling.  
611 *Brain Research*, 606(2), 319–324. [https://doi.org/10.1016/0006-8993\(93\)91001-9](https://doi.org/10.1016/0006-8993(93)91001-9)

612 Williams, H. (2001). Choreography of song, dance and beak movements in the zebra finch (*Taeniopygia*  
613 *guttata*). *Journal of Experimental Biology*, 204(20), 3497–3506.  
614 <https://doi.org/10.1242/jeb.204.20.3497>

615 Woolley, S. C., & Doupe, A. J. (2008). Social Context–Induced Song Variation Affects Female Behavior  
616 and Gene Expression. *PLoS Biology*, 6(3), e62. <https://doi.org/10.1371/journal.pbio.0060062>

617 Yu, A. C., & Margoliash, D. (1996). Temporal Hierarchical Control of Singing in Birds. *Science*, 273(5283),  
618 1871–1875. <https://doi.org/10.1126/science.273.5283.1871>

619 Zampiga, E., Gaibani, G., Csermely, D., Frey, H., & Hoi, H. (2006). Innate and learned aspects of vole urine  
620 UV-reflectance use in the hunting behaviour of the common kestrel *Falco tinnunculus*. *Journal of*  
621 *Avian Biology*, 37(4), 318–322. <https://doi.org/10.1111/j.2006.0908-8857.03825.x>

622

## Supplemental Information

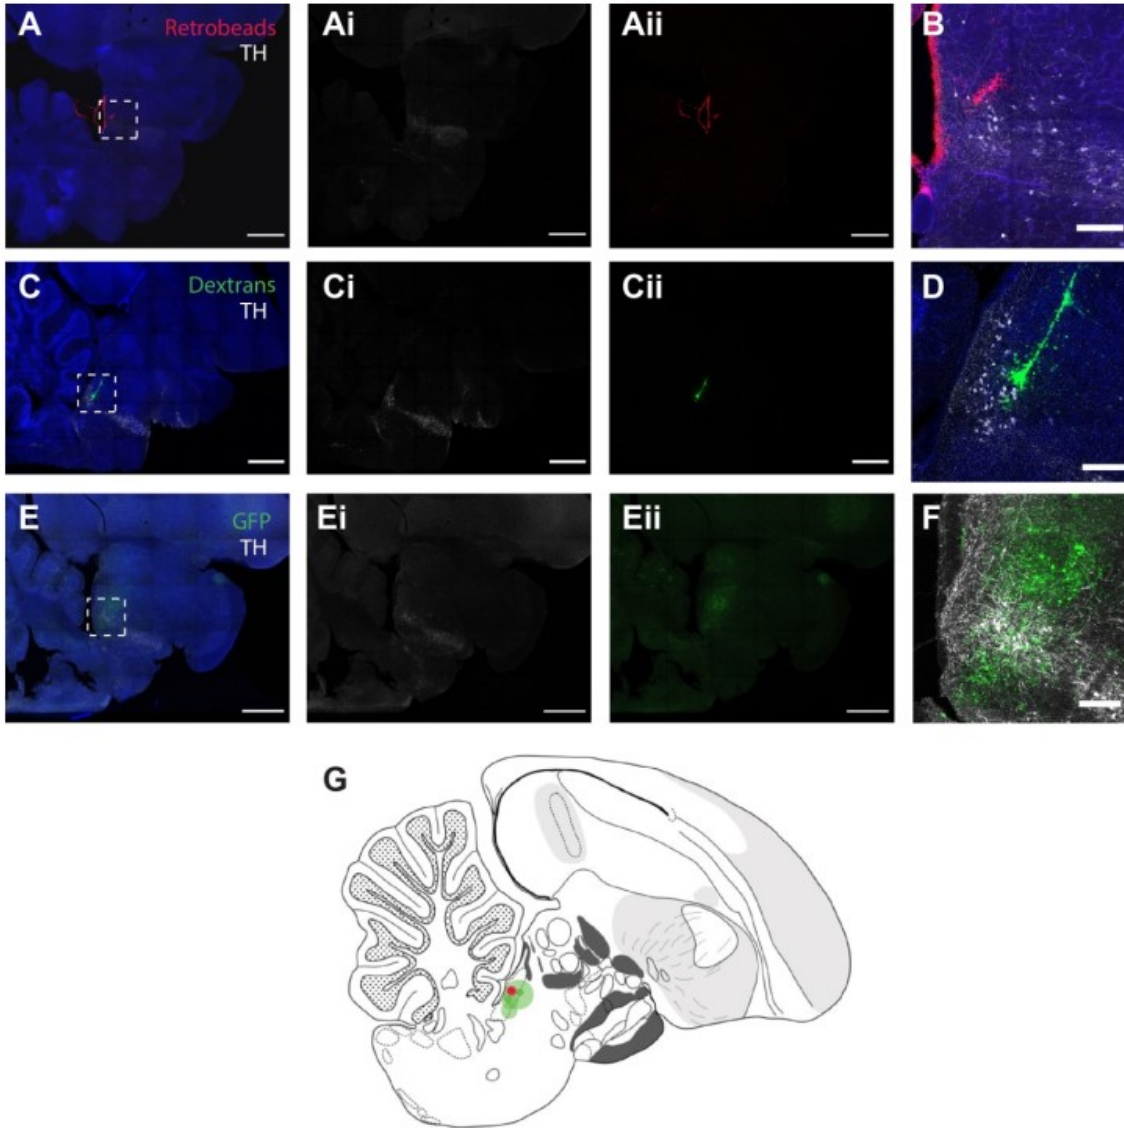

**Figure 1 – supplementary figure 1. Tracing A11 inputs and outputs.** (A) Representative sagittal section of the injection site in A11 for retrograde tracing (red) with fluorescent Nissl-staining (blue) and TH antibody labeling (pseudo-colored grey), scale bars, 1 mm. Left panel shows image composite and subsequent panels (ai, aii) individual channels. (B) area magnification of the rectangle shown in (a), scale bar, 200  $\mu$ m. (C-F) Same as (A) and (B) for bidirectional tracing with dextrans (green) and anterograde viral tracing with GFP (green). (G) Schematic of injection sites and approximate diffusion of the tracers mapped on a sagittal section of the histological atlas (N = 5 hemispheres from 5 birds).

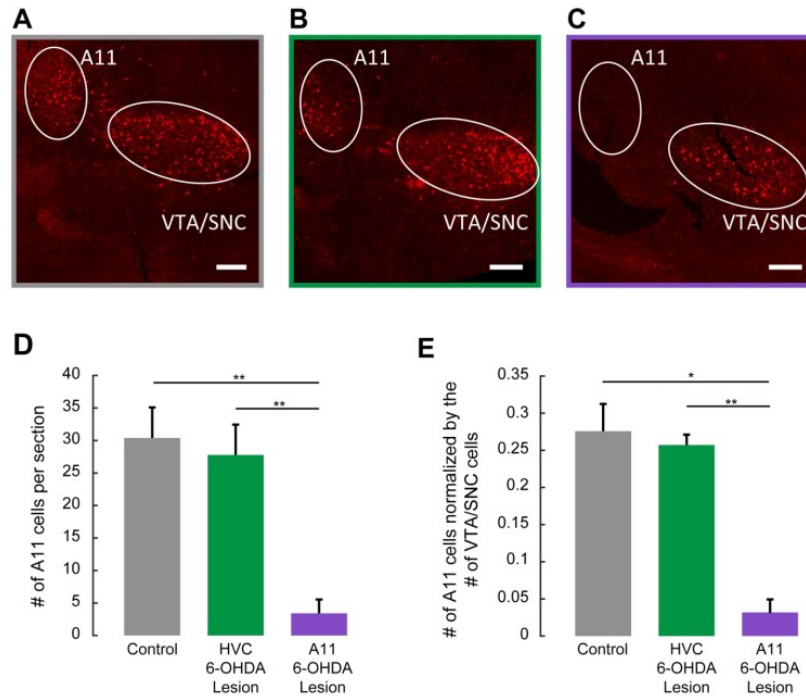

**Figure 3 – supplementary figure 1. Effects of 6-OHDA injection into A11 or HVC on DA cell bodies in the midbrain. (A)** A maximum-projected confocal image of serial sagittal sections, showing A11 and VTA/SNC TH immunolabelling (approximately 0.5 mm lateral of the midline) in control birds. Similar results were obtained in 4 independently repeated experiments. Scale bar is 200  $\mu$ m. **(B)** A maximum-projected confocal image of serial sagittal sections, showing A11 and VTA/Snc TH immunolabelling in a bird that was injected with 6-OHDA in HVC. Similar results were obtained in 4 independently repeated experiments. Scale bar is 200  $\mu$ m. **(C)** Same as (A), showing A11 and VTA/Snc TH immunolabelling, in a bird that was injected with 6-OHDA in A11. Similar results were obtained in 4 independently repeated experiments. Scale bar is 200  $\mu$ m. **(D)** Mean number of A11 cells in maximum-projected sections for the three experimental groups (1-4 sections scored from N=4 birds in each condition). Number of A11 TH+ cells was significantly greater in control and HVC 6-OHDA groups than in the A11 6-OHDA group (one-way ANOVA,  $p < 0.005$ , followed by post-hoc Tukey tests, two asterisks denote  $p < 0.01$ ). **e**, Number of A11 cells in a maximum-projected section normalized to the number of VTA/Snc cells from the same section for the three experimental groups. Number of normalized A11 TH+ cells were significantly lower in the A11-treated group than the number of A11 TH+ cells in the other groups (one-way anova,  $p < 0.01$ , followed by post-hoc Tukey tests, one asterisk denotes  $p < 0.05$ , two asterisks denote  $p < 0.01$ ).

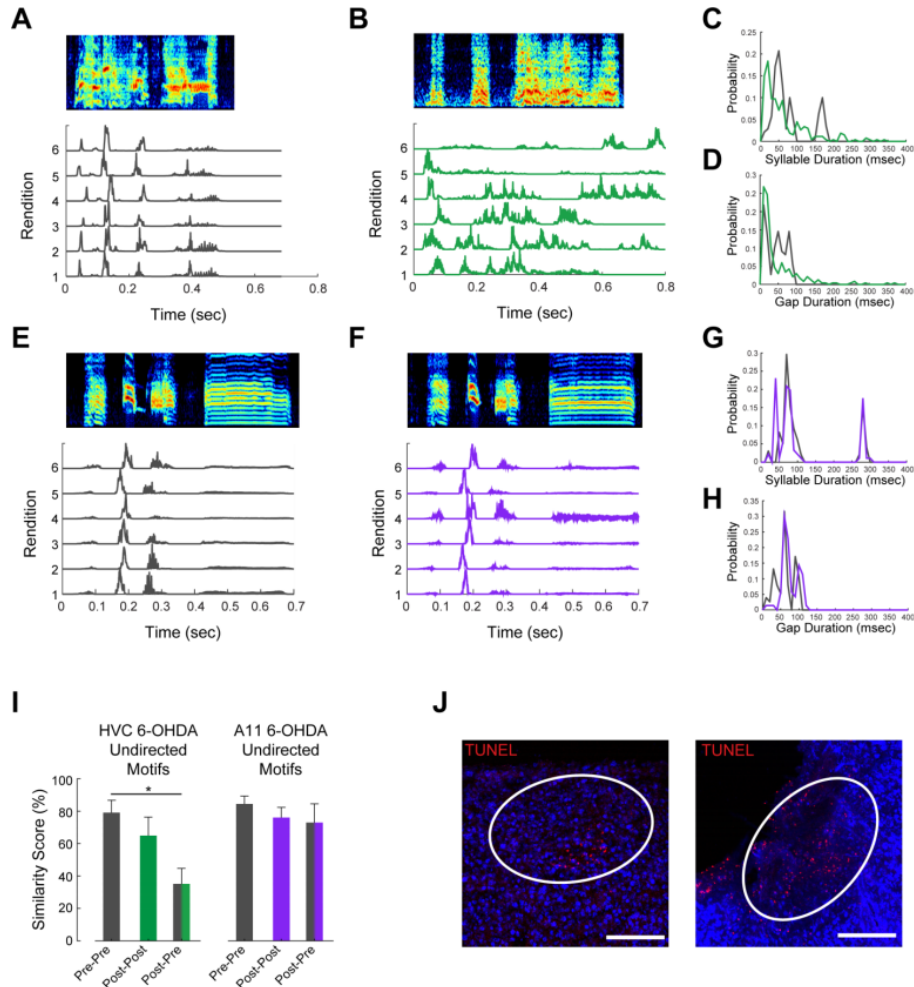

**Figure 3 – supplementary figure 2. 6-OHDA treatment effect on song motifs.** (A) An example sonogram (top) and amplitude envelopes (bottom traces) of undirected song renditions of an intact, untreated male zebra finch. (B) Same as in (A), for the same male after treatment with 6-OHDA in HVC. (C) Distributions of syllable durations for pre-treatment (grey) and post HVC 6-OHDA treatment (green). (D) Distributions of inter-syllable gap durations for pre-treatment (grey) and post HVC 6-OHDA treatment (green). (E-H) Same as (A-D), for A11 6-OHDA treatment. (I). Pairwise similarity scores for randomly selected undirected motifs (left-most columns for HVC 6-OHDA treated birds, right-most columns for A11 6-OHDA treated birds). Data are mean  $\pm$  s.e.m. Only the motifs produced by the HVC 6-OHDA treated group were significantly less similar post treatment compared to pre-treatment. (One-way repeated measurements ANOVA  $p < 0.05$ . Post-hoc Tukey test, asterisk denotes  $p < 0.05$ ). (J) Two examples of terminal deoxynucleotidyl transferase dUTP nick end labeling (TUNEL), used to detect DNA breaks formed during the final phase of apoptosis, after the injection of 6-OHDA in HVC, scale bars 200  $\mu\text{m}$ .

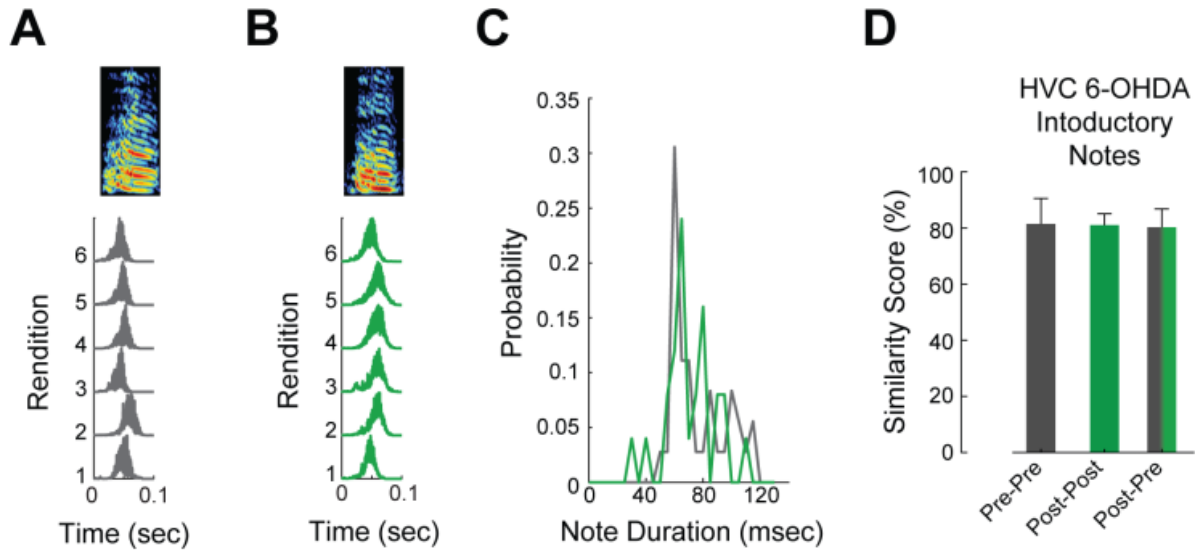

**Figure 4 – supplementary figure 1. 6-OHDA treatment effect on introductory notes.** (A) An example sonogram (top) and amplitude envelopes (bottom traces) of introductory notes of an intact, untreated male zebra finch. (B) Same as in (A), for the same male after treatment with 6-OHDA in HVC. (C) Distributions of introductory note durations for pre-treatment (grey) and post HVC 6-OHDA treatment (green). (D) Pairwise similarity scores for randomly selected introductory notes.

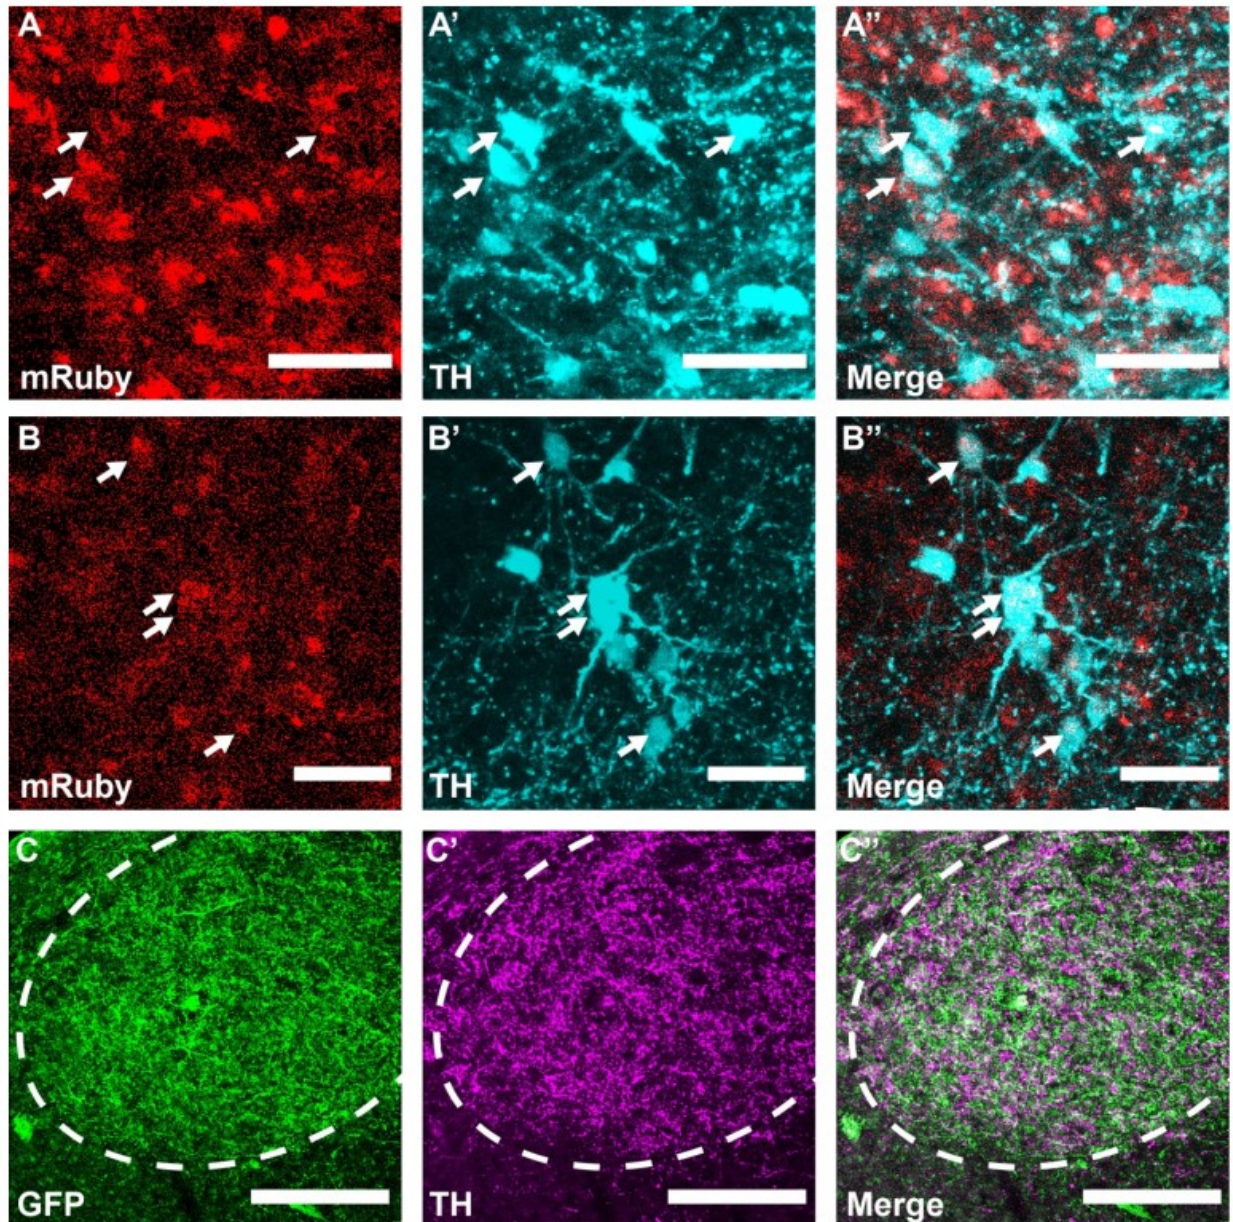

**Figure 5 – supplementary figure 1. Axon-targeted GCaMP expression in A11 cell bodies and terminals in HVC. (A)**

Representative sagittal section of the injection site in A11 with axon-targeted GCaMP (mRuby, red) and TH antibody labeling (pseudo-colored cyan), scale bars, 50  $\mu$ m. (B) Same as in (A) for a different bird. (C)

Representative sagittal section of A11 axons in HVC expressing GCaMP (GFP, green) and TH antibody labeling (pseudo-colored magenta), scale bars, 200  $\mu$ m. Both the GFP and TH labeling is confined to HVC.

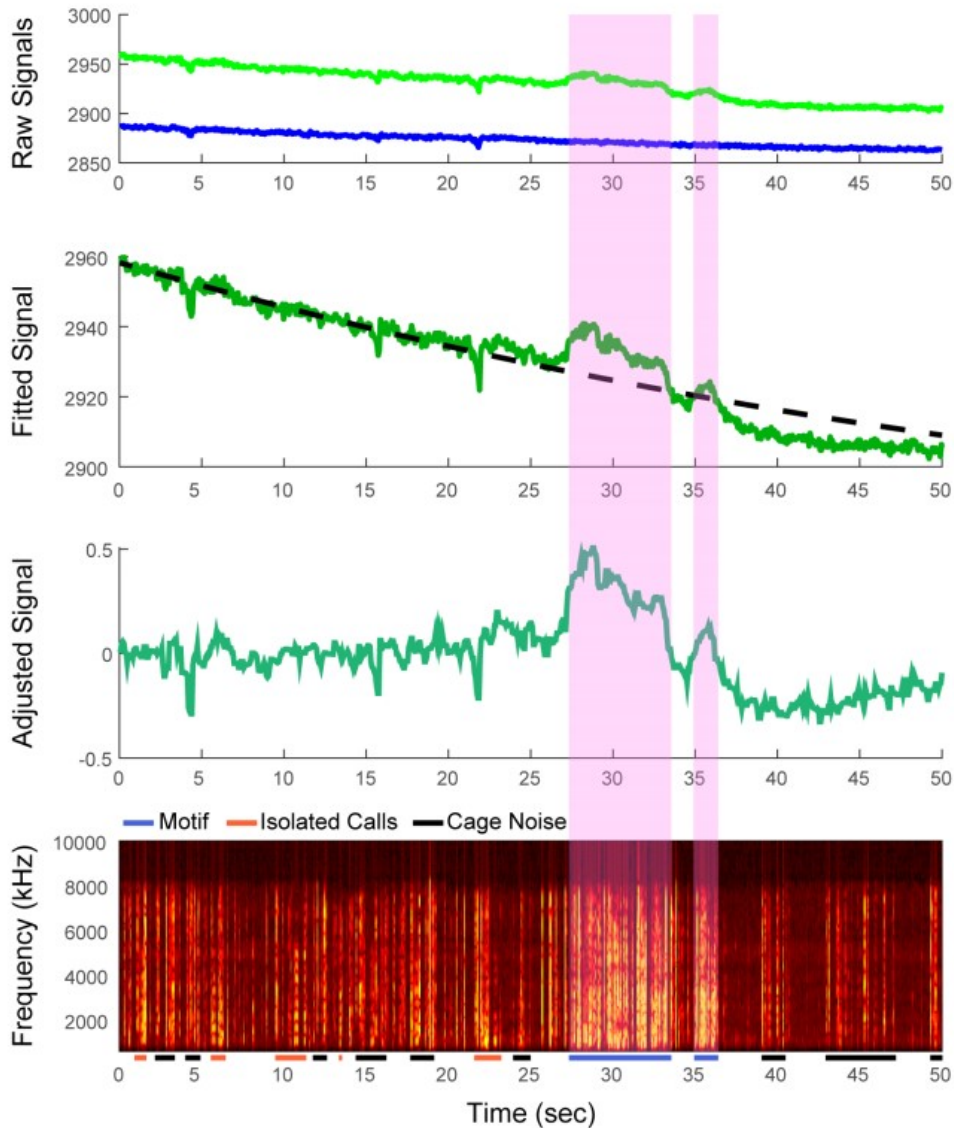

**Figure 5 – supplementary figure 2. Extraction of A11 axon terminal activity signals in HVC.** Top panel: raw signals acquired from exciting HVC with two wavelengths of light: 470nm for imaging of calcium-dependent signals (green) and 415nm for an interleaved isosbestic control (blue). Second panel: regressed control channel (dotted black line) to the trace from the signal channel (green). This regression was used to compute a linear model to generate a predicted signal. Third panel: Filtered calcium-dependent signal after subtracting the predicted control signal from the raw calcium-dependent signal. Bottom panel: spectrogram of the audio recording from the same imaging session. Pink shading denotes instances of female-directed vocalization. Other audio events consist of cage noises and female vocalizations.



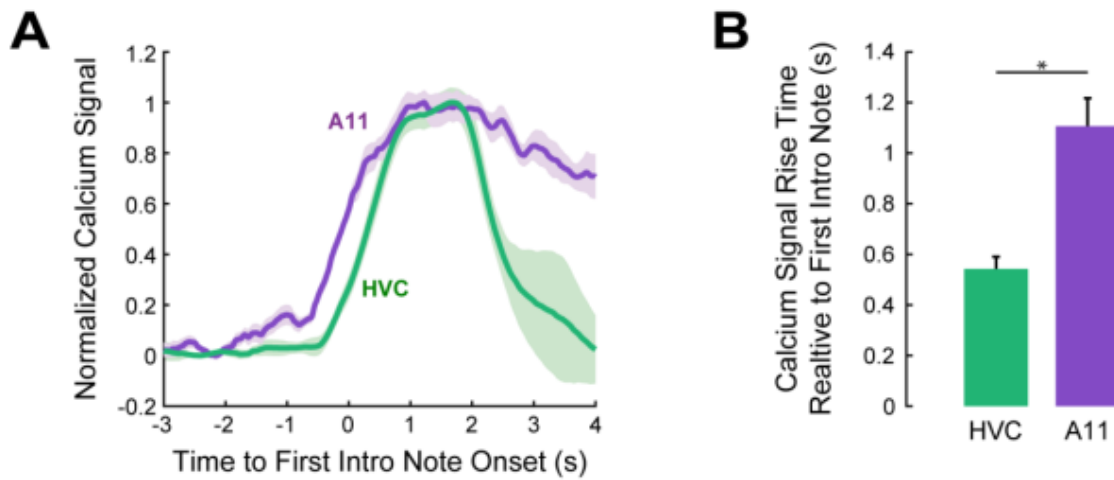

**Figure 5 – supplementary figure 3. A11 and HVC axons activity aligned to the first introductory notes. (A)** Calcium traces from one A11 axons bird and one HVC axons bird, aligned to the first introductory note. A11 axons calcium signal start rising before the production of the first introductory note and precedes HVC local axons activity. **(B)** Mean calcium rise time relative to first introductory note for the HVC group (N = 4 birds) and A11 group (N = 4 birds). Calcium rise times for the A11 group is significantly earlier than the HVC group (t-test,  $p < 0.005$ ).

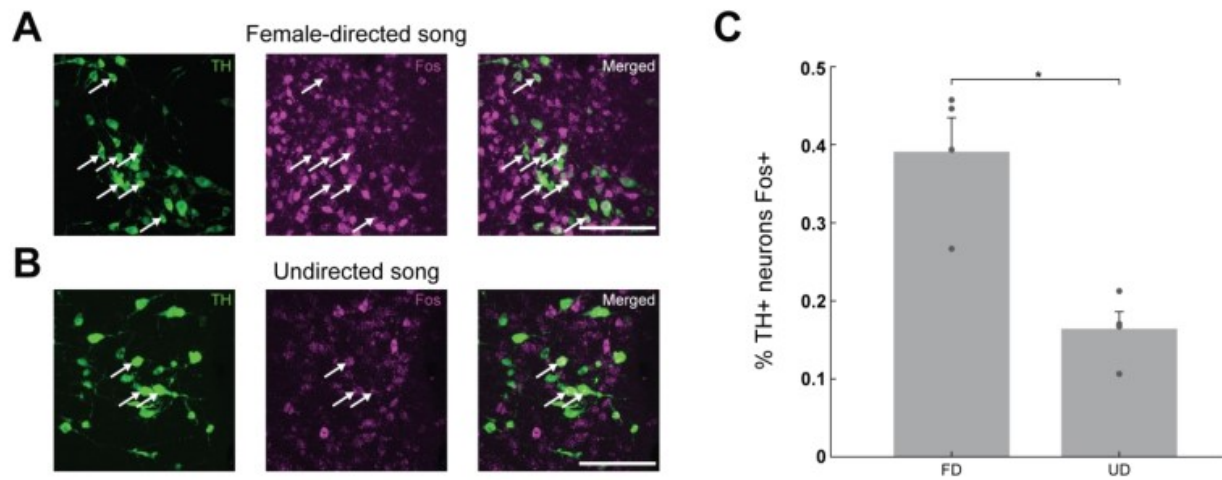

**Figure 5 – supplementary figure 4. Immunocytochemical labeling of Fos positive A11 neurons. (A)** TH positive A11 neurons (left panel) Fos positive A11 neurons (middle panel) and double labeled neurons (right panel) of a bird that performed female-directed singing. Scale bar, 100  $\mu$ m. **(B)** Same as in (A) for a bird that performed undirected songs. **(C)** An elevated Fos response in A11 neurons was shown in males after female-directed song (N=4 birds) relative to males after undirected songs (N = 4 birds) (t-test,  $p < 0.005$ ).

### **Movie S1. Social interaction of a naïve male and female zebra finches**

A side view of a male and a female zebra finch with an electronic glass separating between them. When the frame is red, the glass is opaque, and the birds cannot see each other. When the frame turns green., the glass turns clear and the female is visible to the male. The male readily sings to the female as soon as she becomes visible, together with other innate movements. On the bottom: a spectrogram of the audio recorded during the interaction.

### **Movie S2. Social interaction of a male after 6-OHDA treatment in HVC with a female**

Social interaction of a male zebra finch that received injections of 6-OHDA into HVC. On the bottom: a spectrogram of the audio recorded during the interaction. Vocalizations consist of repeated introductory notes with no songs.

### **Movie S3. Social interaction of a male after 6-OHDA treatment in A11 with a female**

Social interaction of a male zebra finch that received injections of 6-OHDA into HVC. On the bottom: a spectrogram of the audio recorded during the interaction. Vocalizations consist of cage noises.
